# Supplementary material
Source: ML conference proceedings conference paper supplement (https://openreview.net/forum?id=sS6yP4WQw0)
Supplement: supplementary_material [file sign_unif_d=5000.pdf › code/results/sign_d5000_double_1e-11/sign_unif_d=5000.pdf]

Matrix Sign, Uniform (d=5000)

Log Relative Error

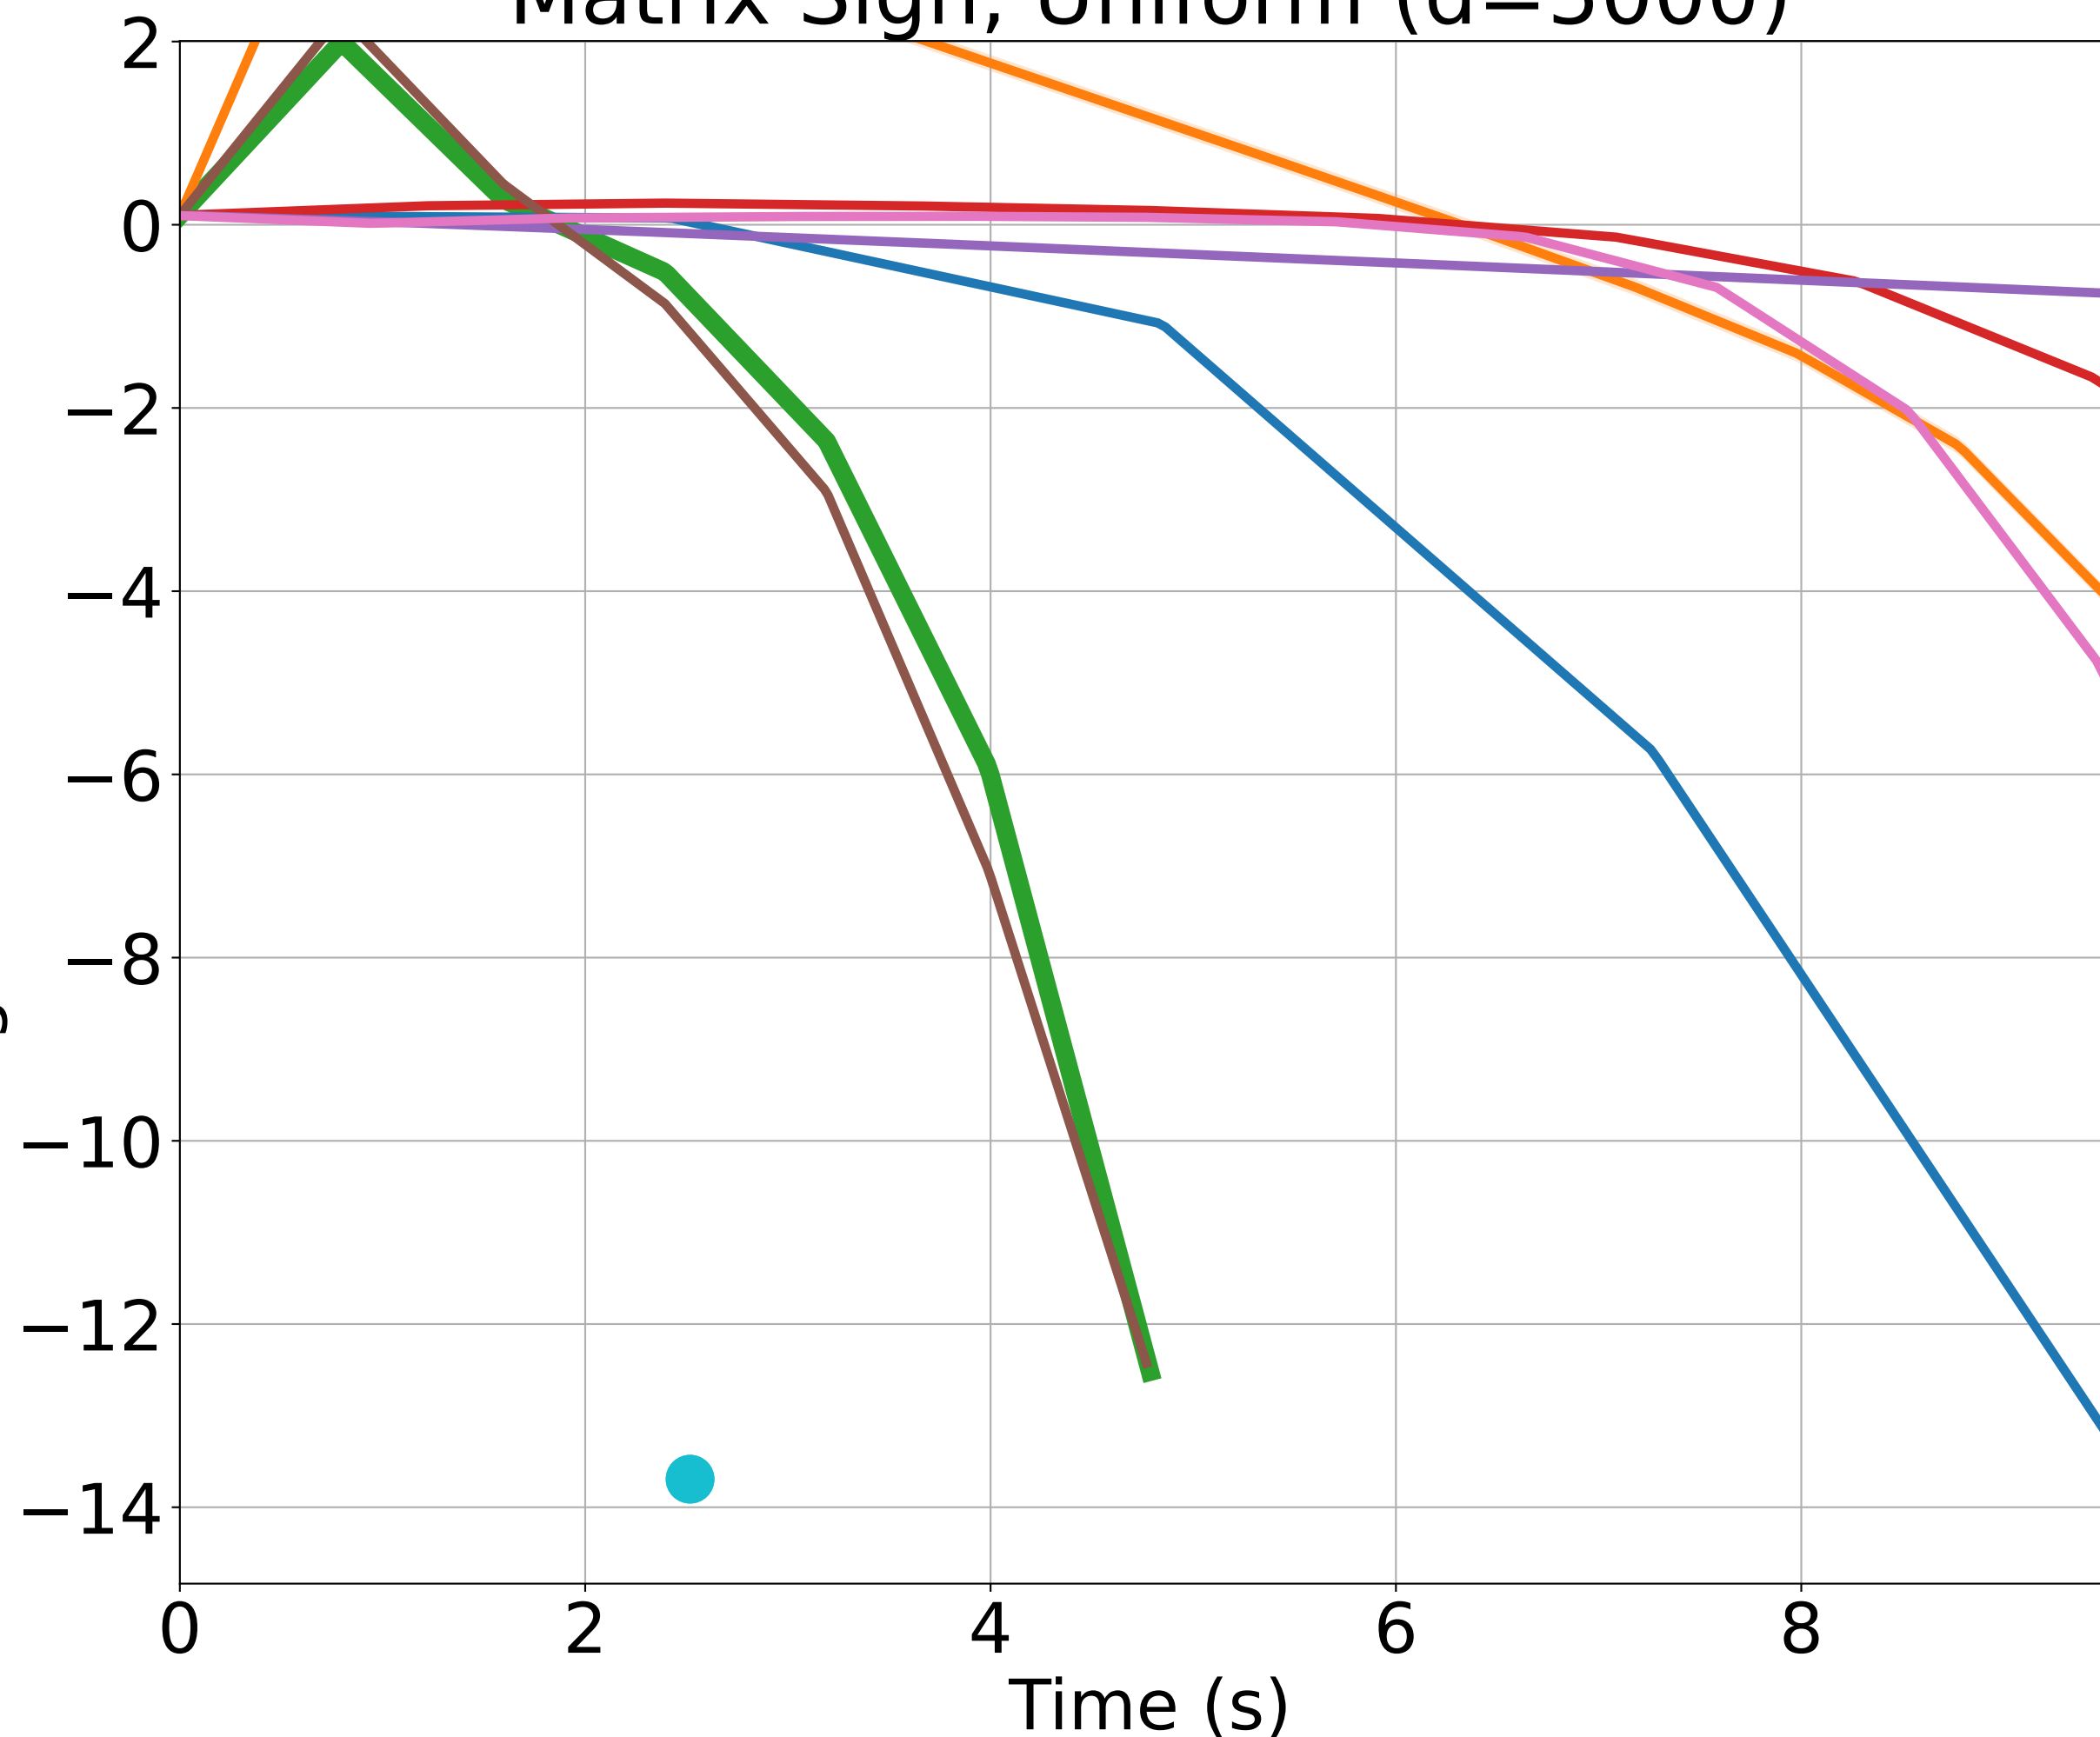

- Algorithm
- MatRL (Ours)**
  - Halley
  - Newton
  - Newton Variant
  - NS
  - Scaled Newton
  - Scaled NS
  - torch.linalg.eigh
