# Supplementary material
Source: ML conference proceedings conference paper supplement (https://openreview.net/forum?id=sS6yP4WQw0)

Matrix Inverse, Uniform (d=5000)

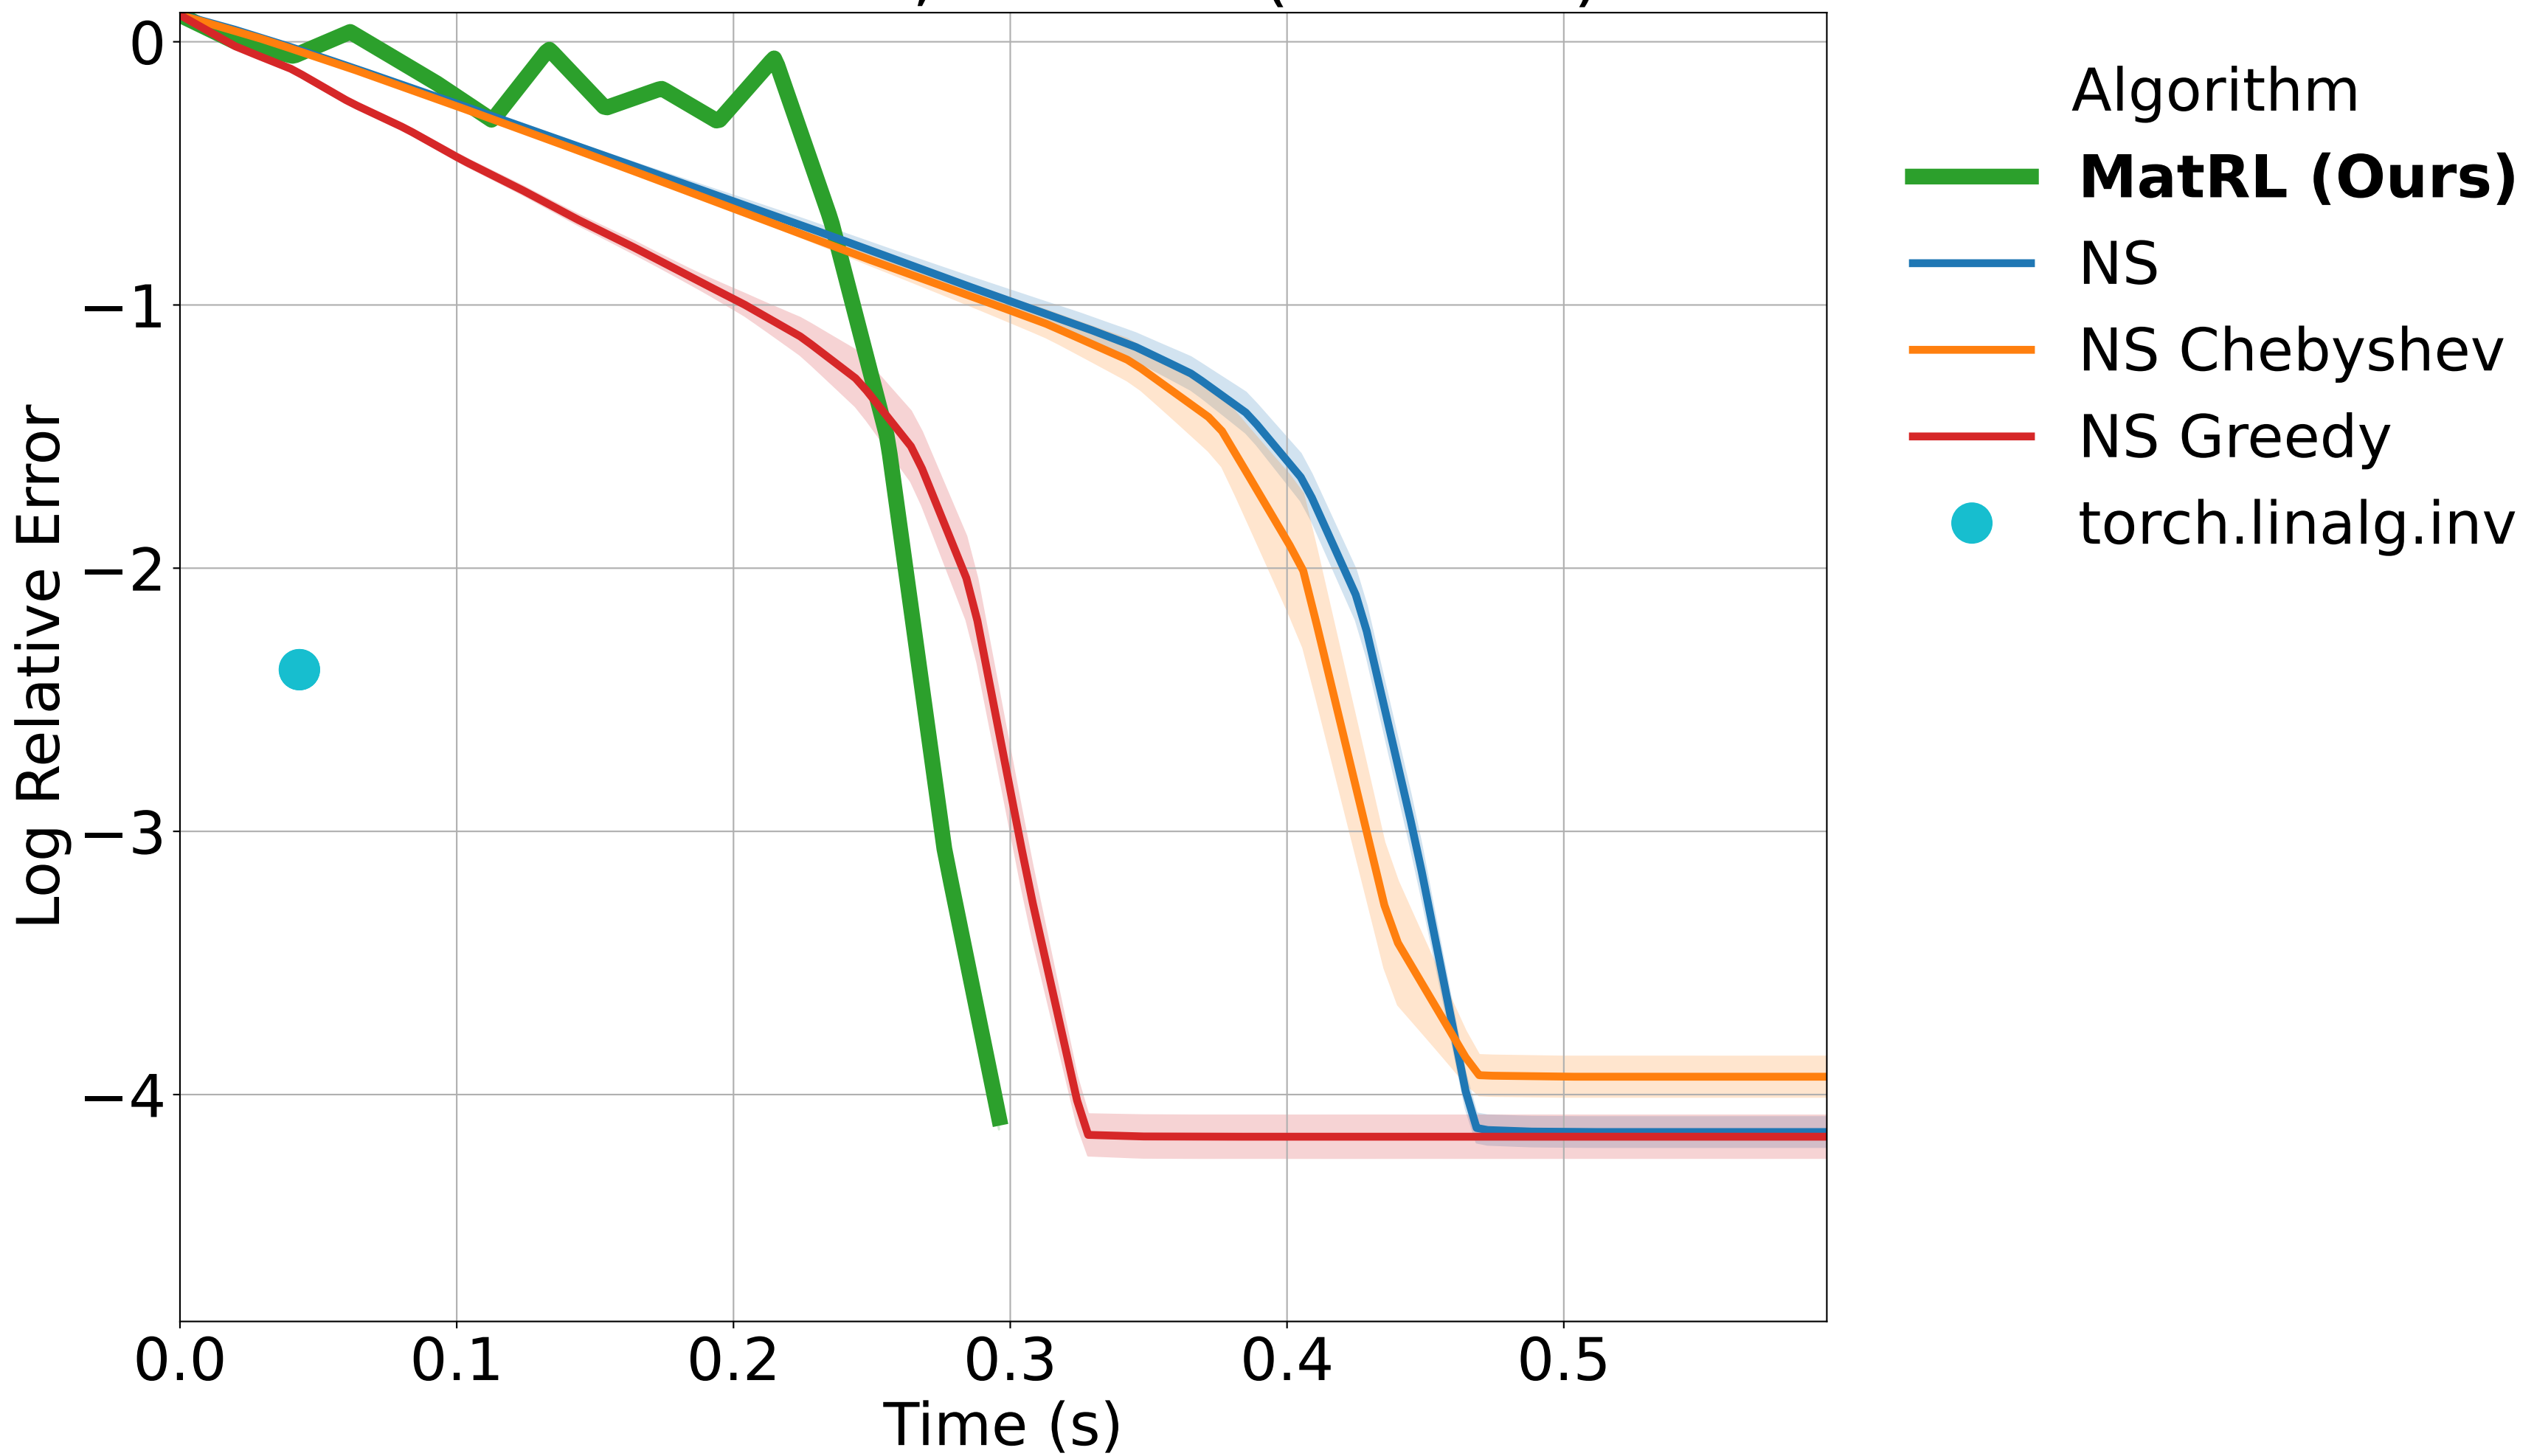

Supplement: supplementary_material [file inv_unif_d=5000.pdf › code/results/inv_d5000/inv_unif_d=5000.pdf]

Matrix Inverse, Wishart (d=5000)

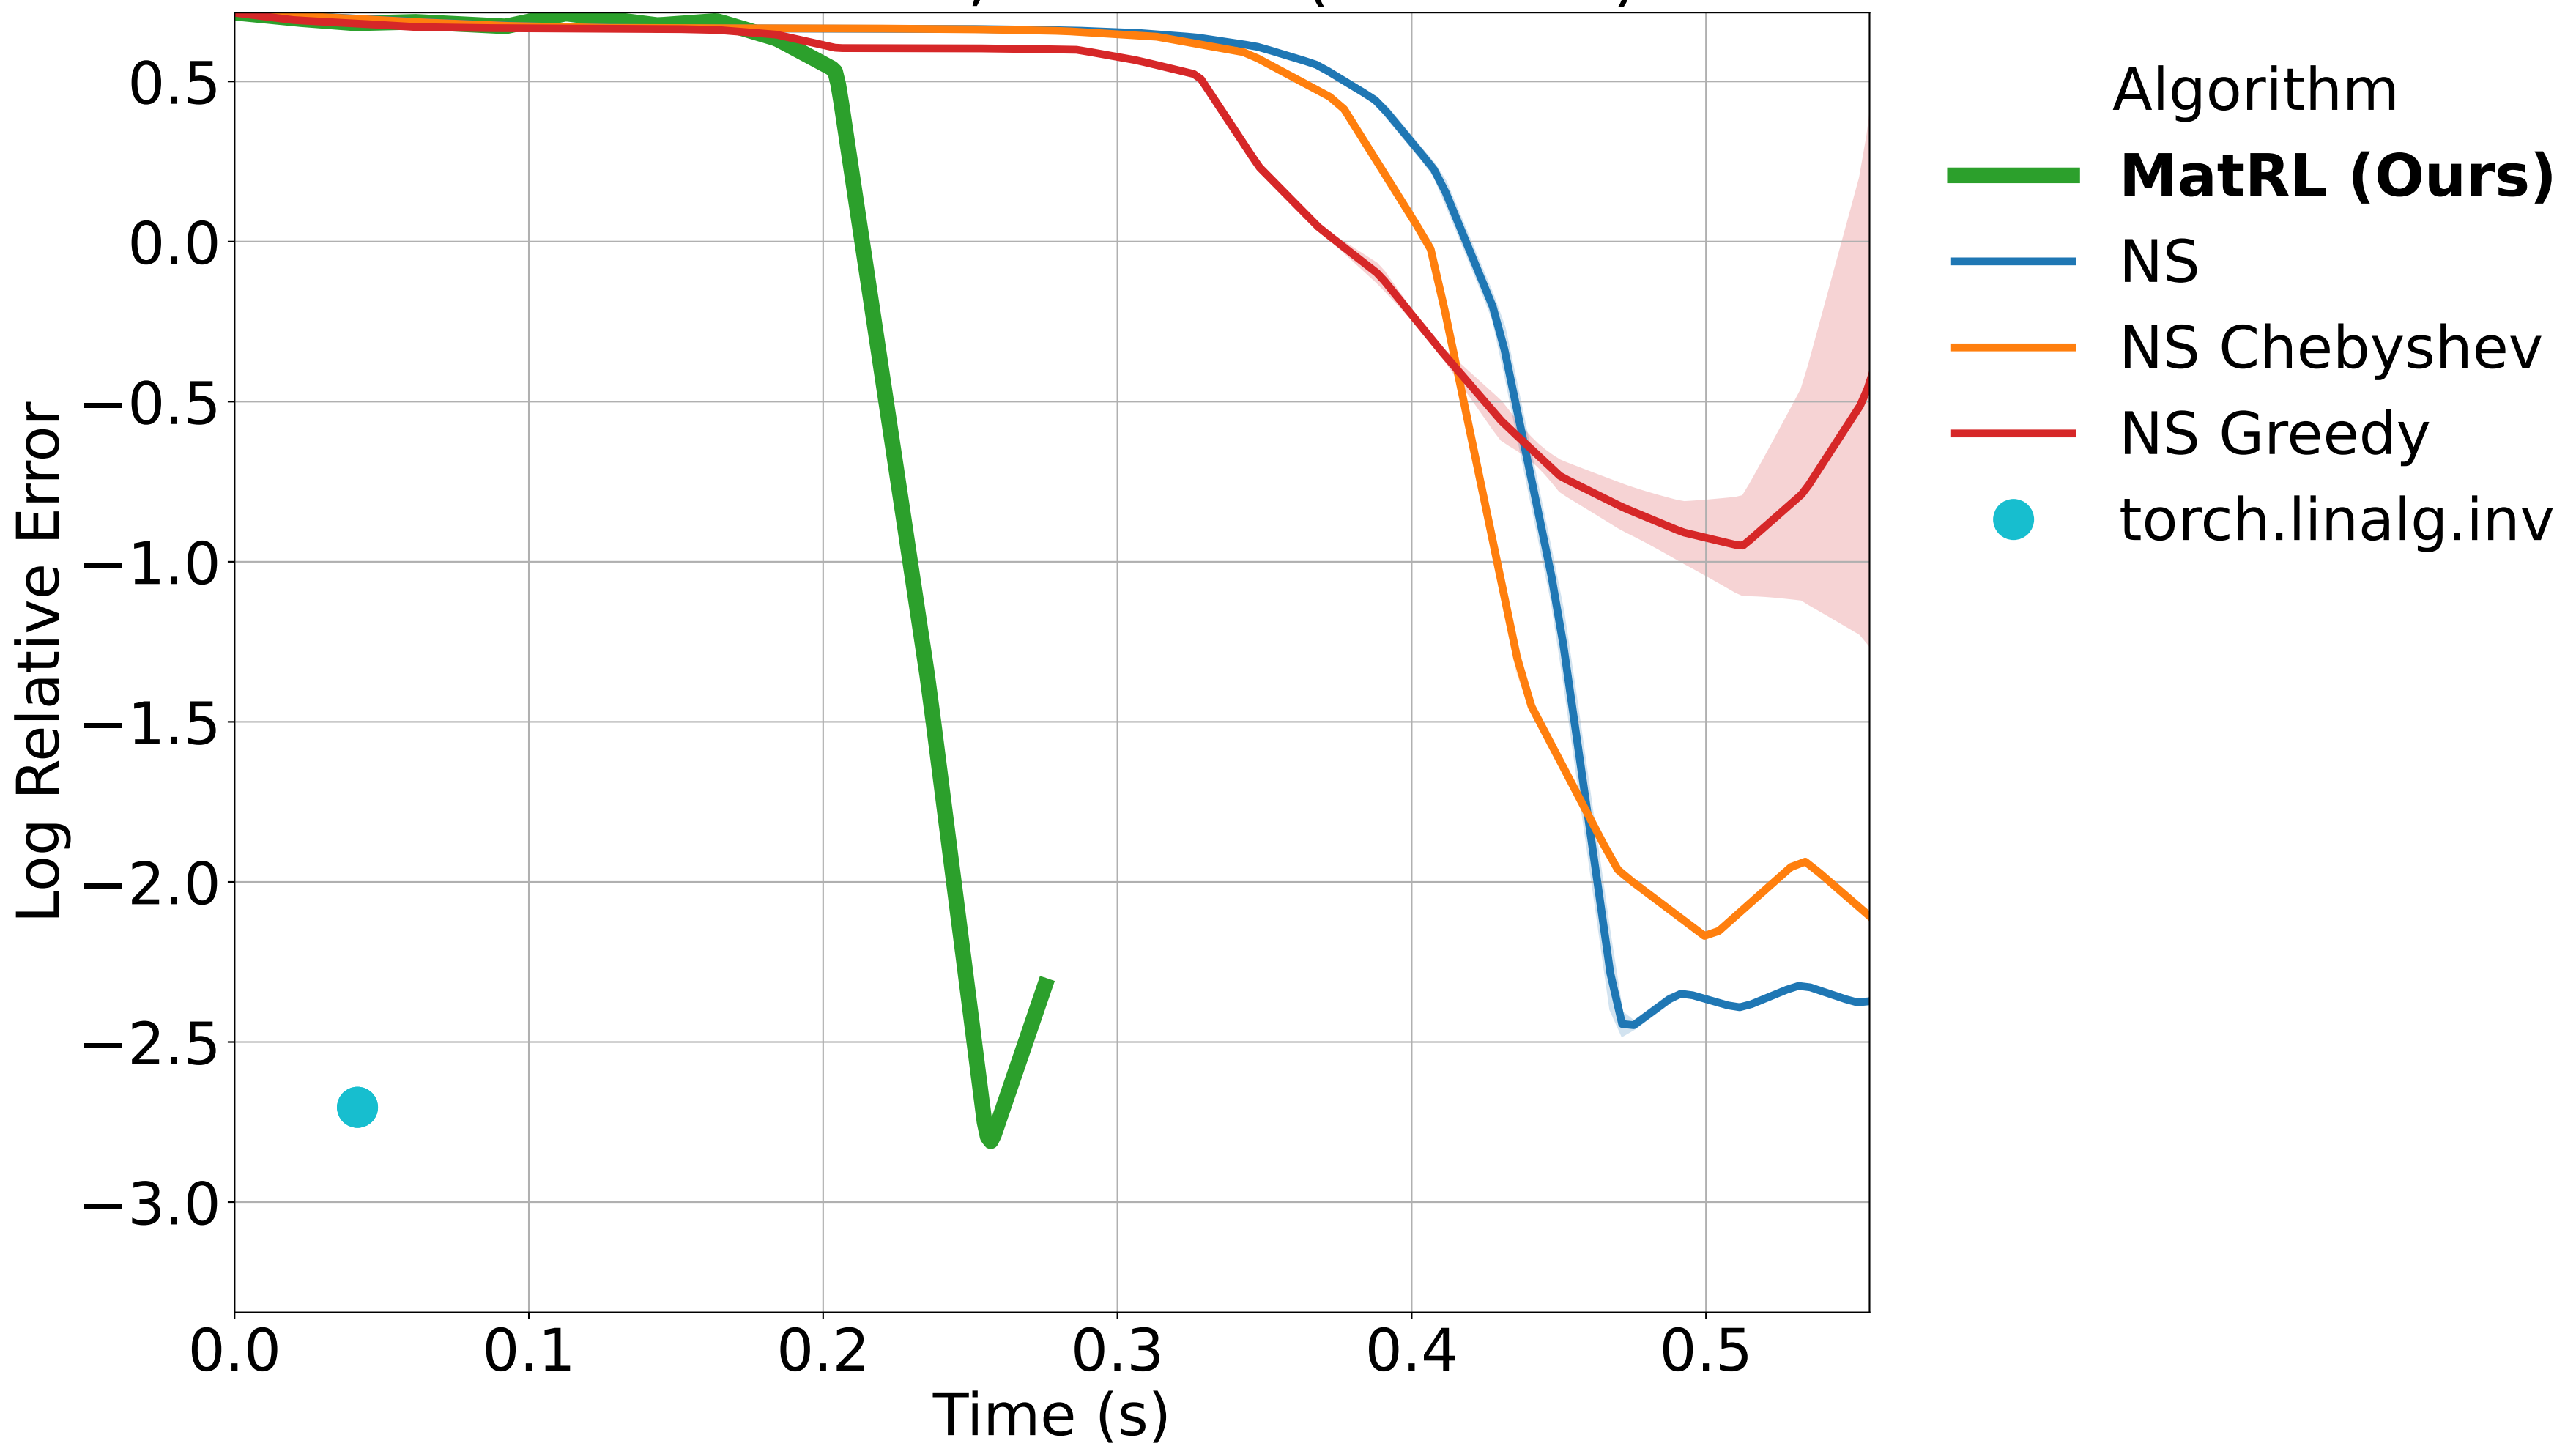

Supplement: supplementary_material [file inv_wishart_d=5000.pdf › code/results/inv_wishart_d5000/inv_wishart_d=5000.pdf]

Matrix pth-root, Wishart (d=5000)

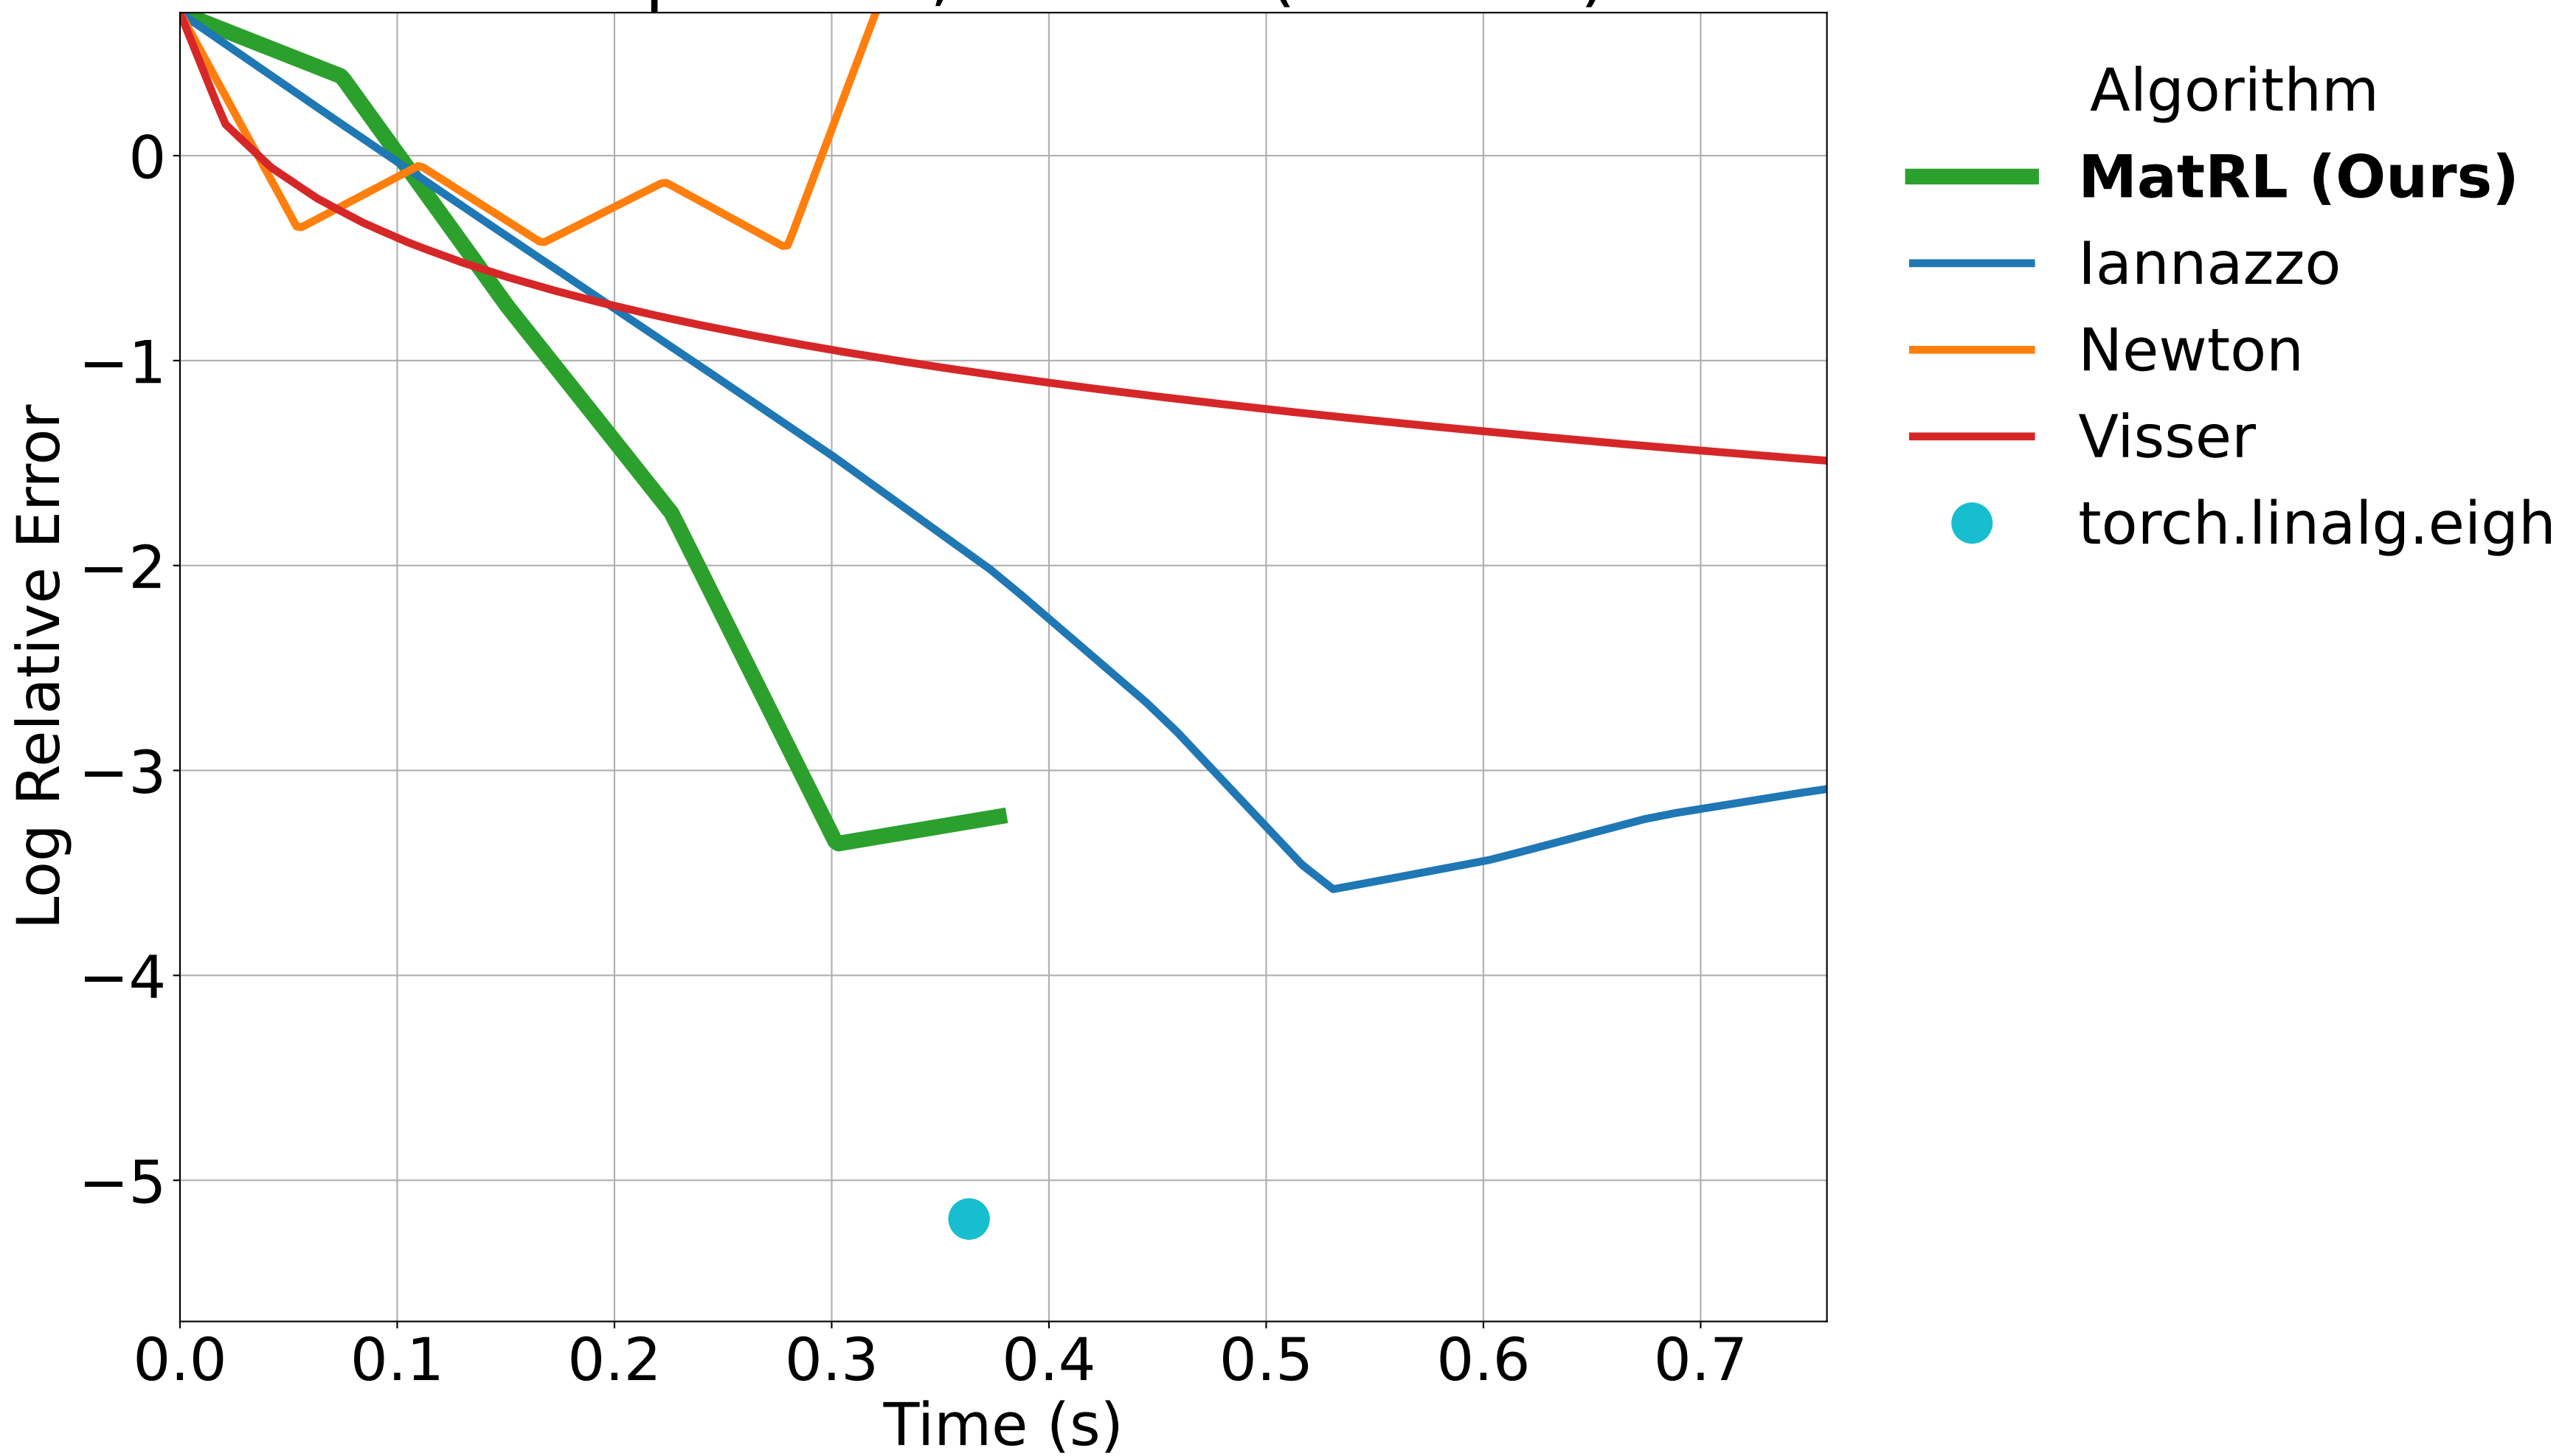

Supplement: supplementary_material [file proot_wishart_d=5000.pdf › code/results/proot_d5000/proot_wishart_d=5000.pdf]

Matrix pth-root, Erdos-Renyi (d=5000)

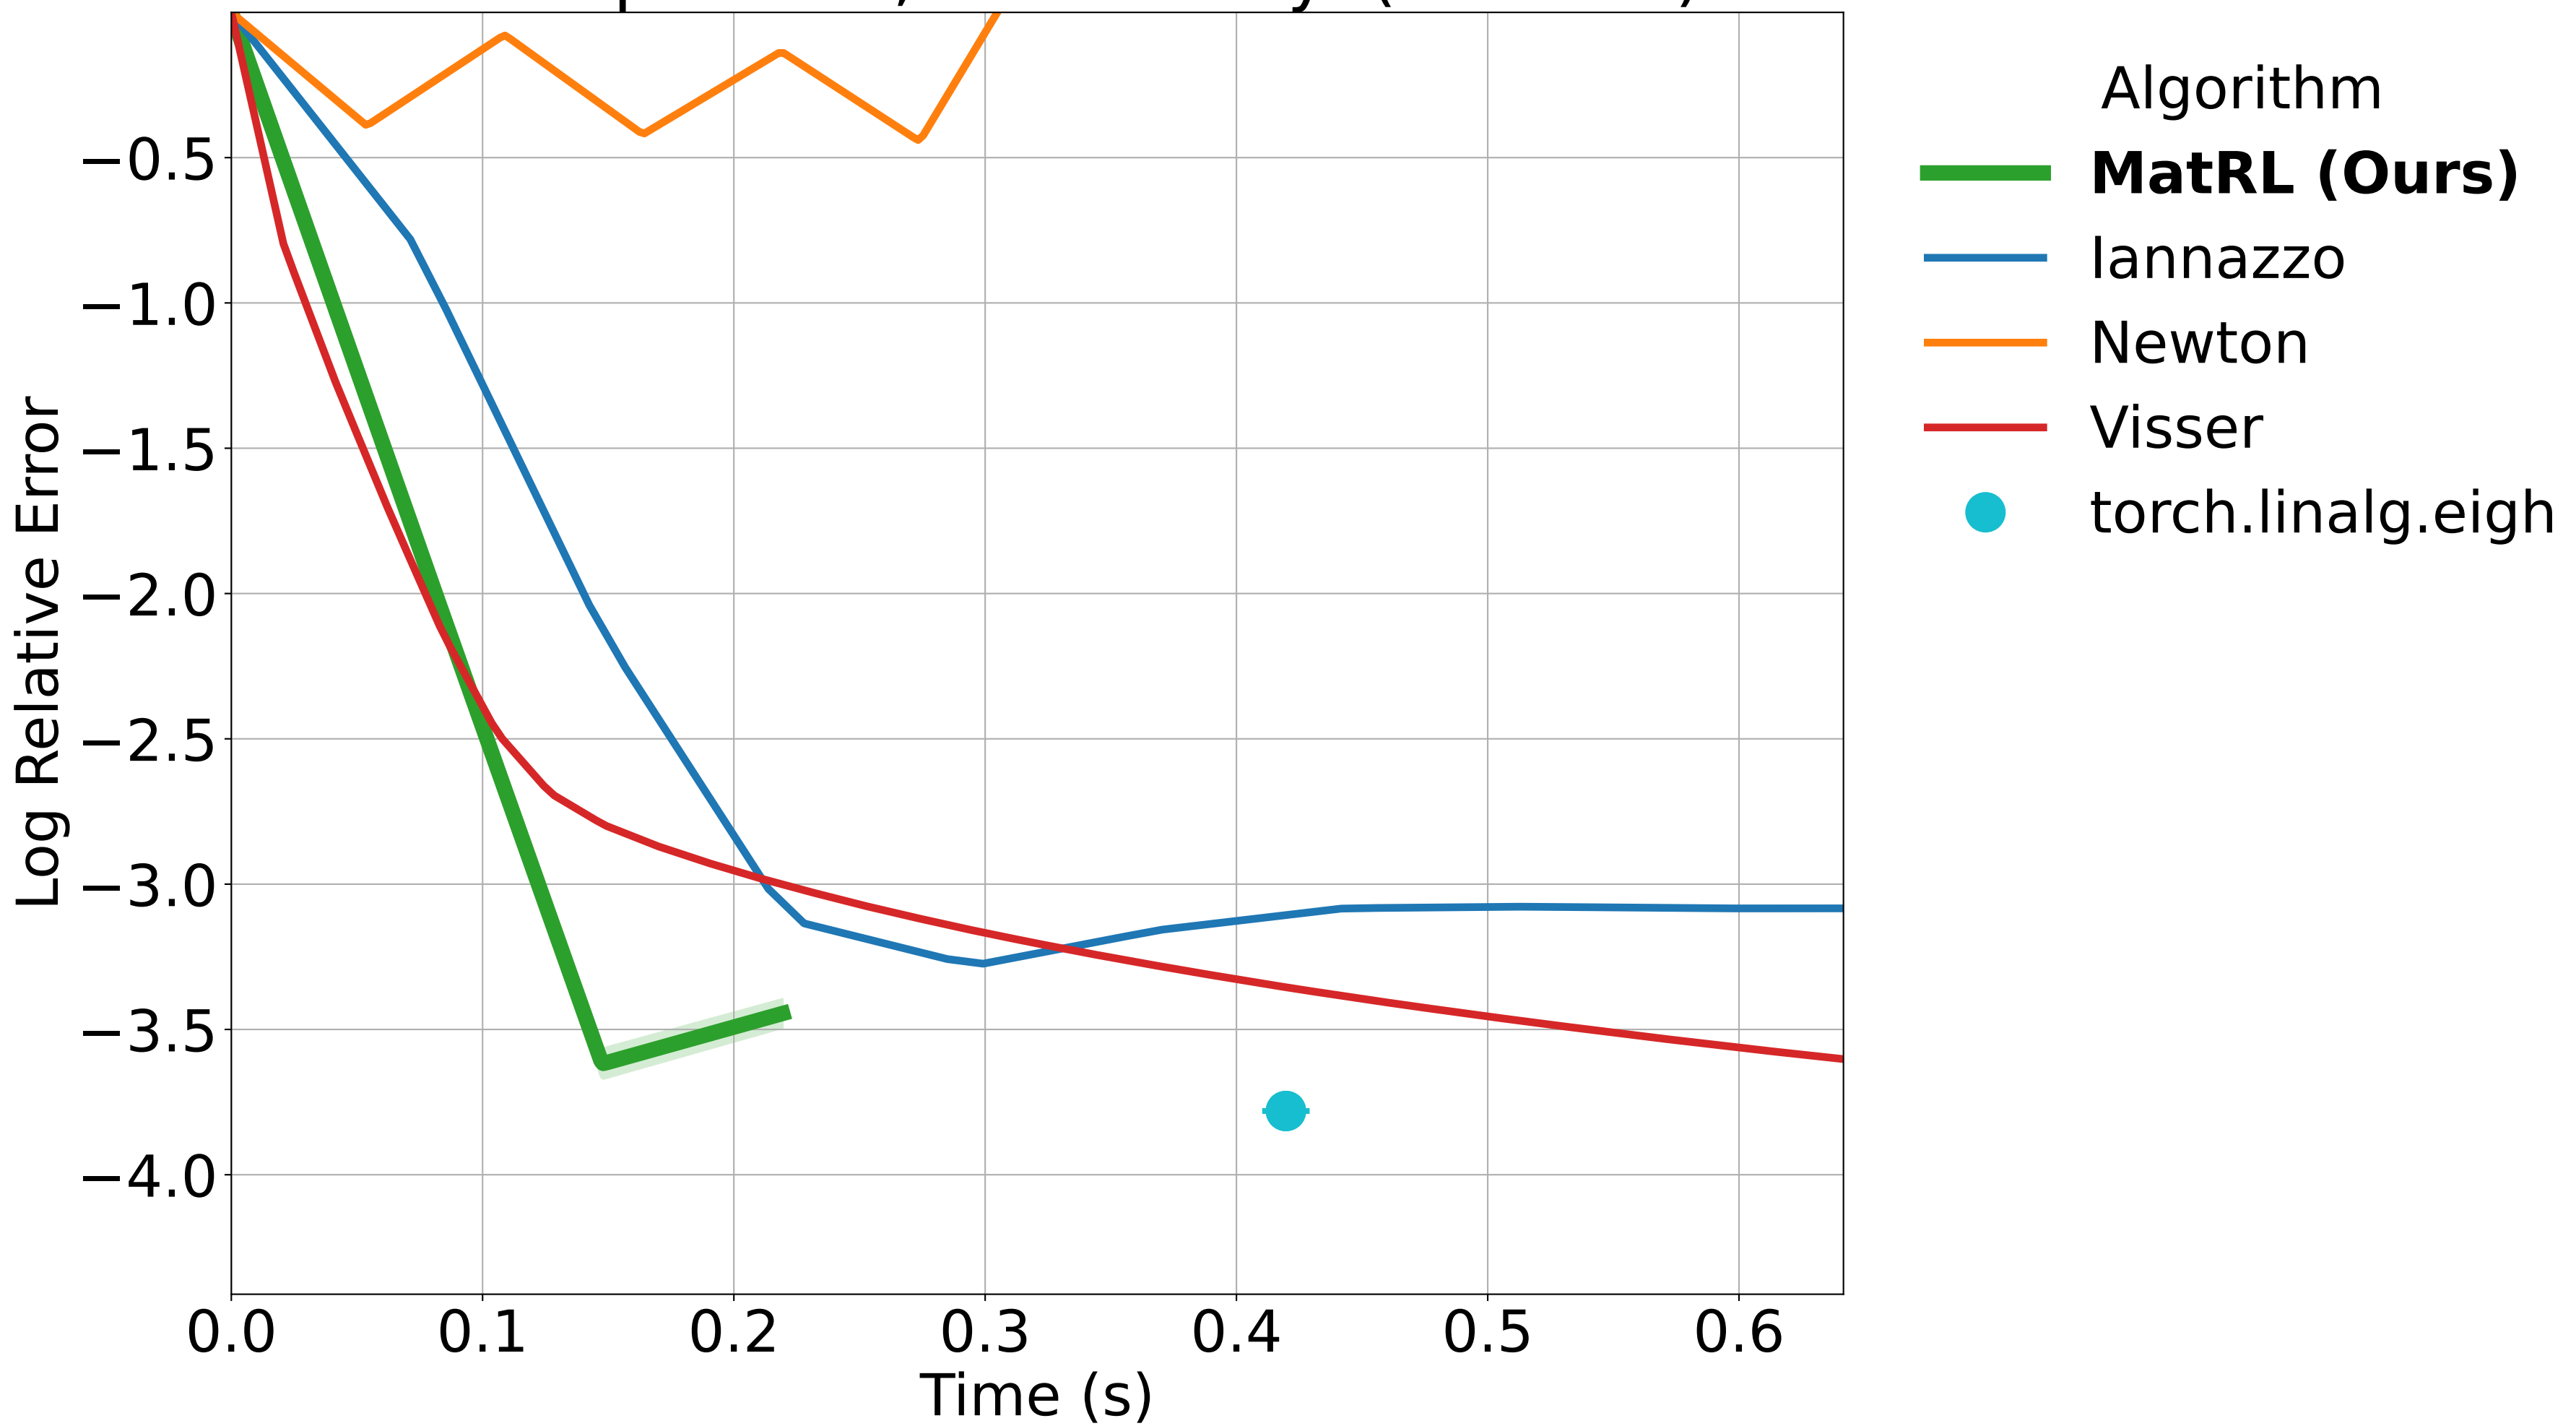

Supplement: supplementary_material [file proot_Erdos_Renyi_d=5000.pdf › code/results/proot_graphLaplacian/proot_Erdos_Renyi_d=5000.pdf]

# Matrix Sign, Uniform (d=10000)

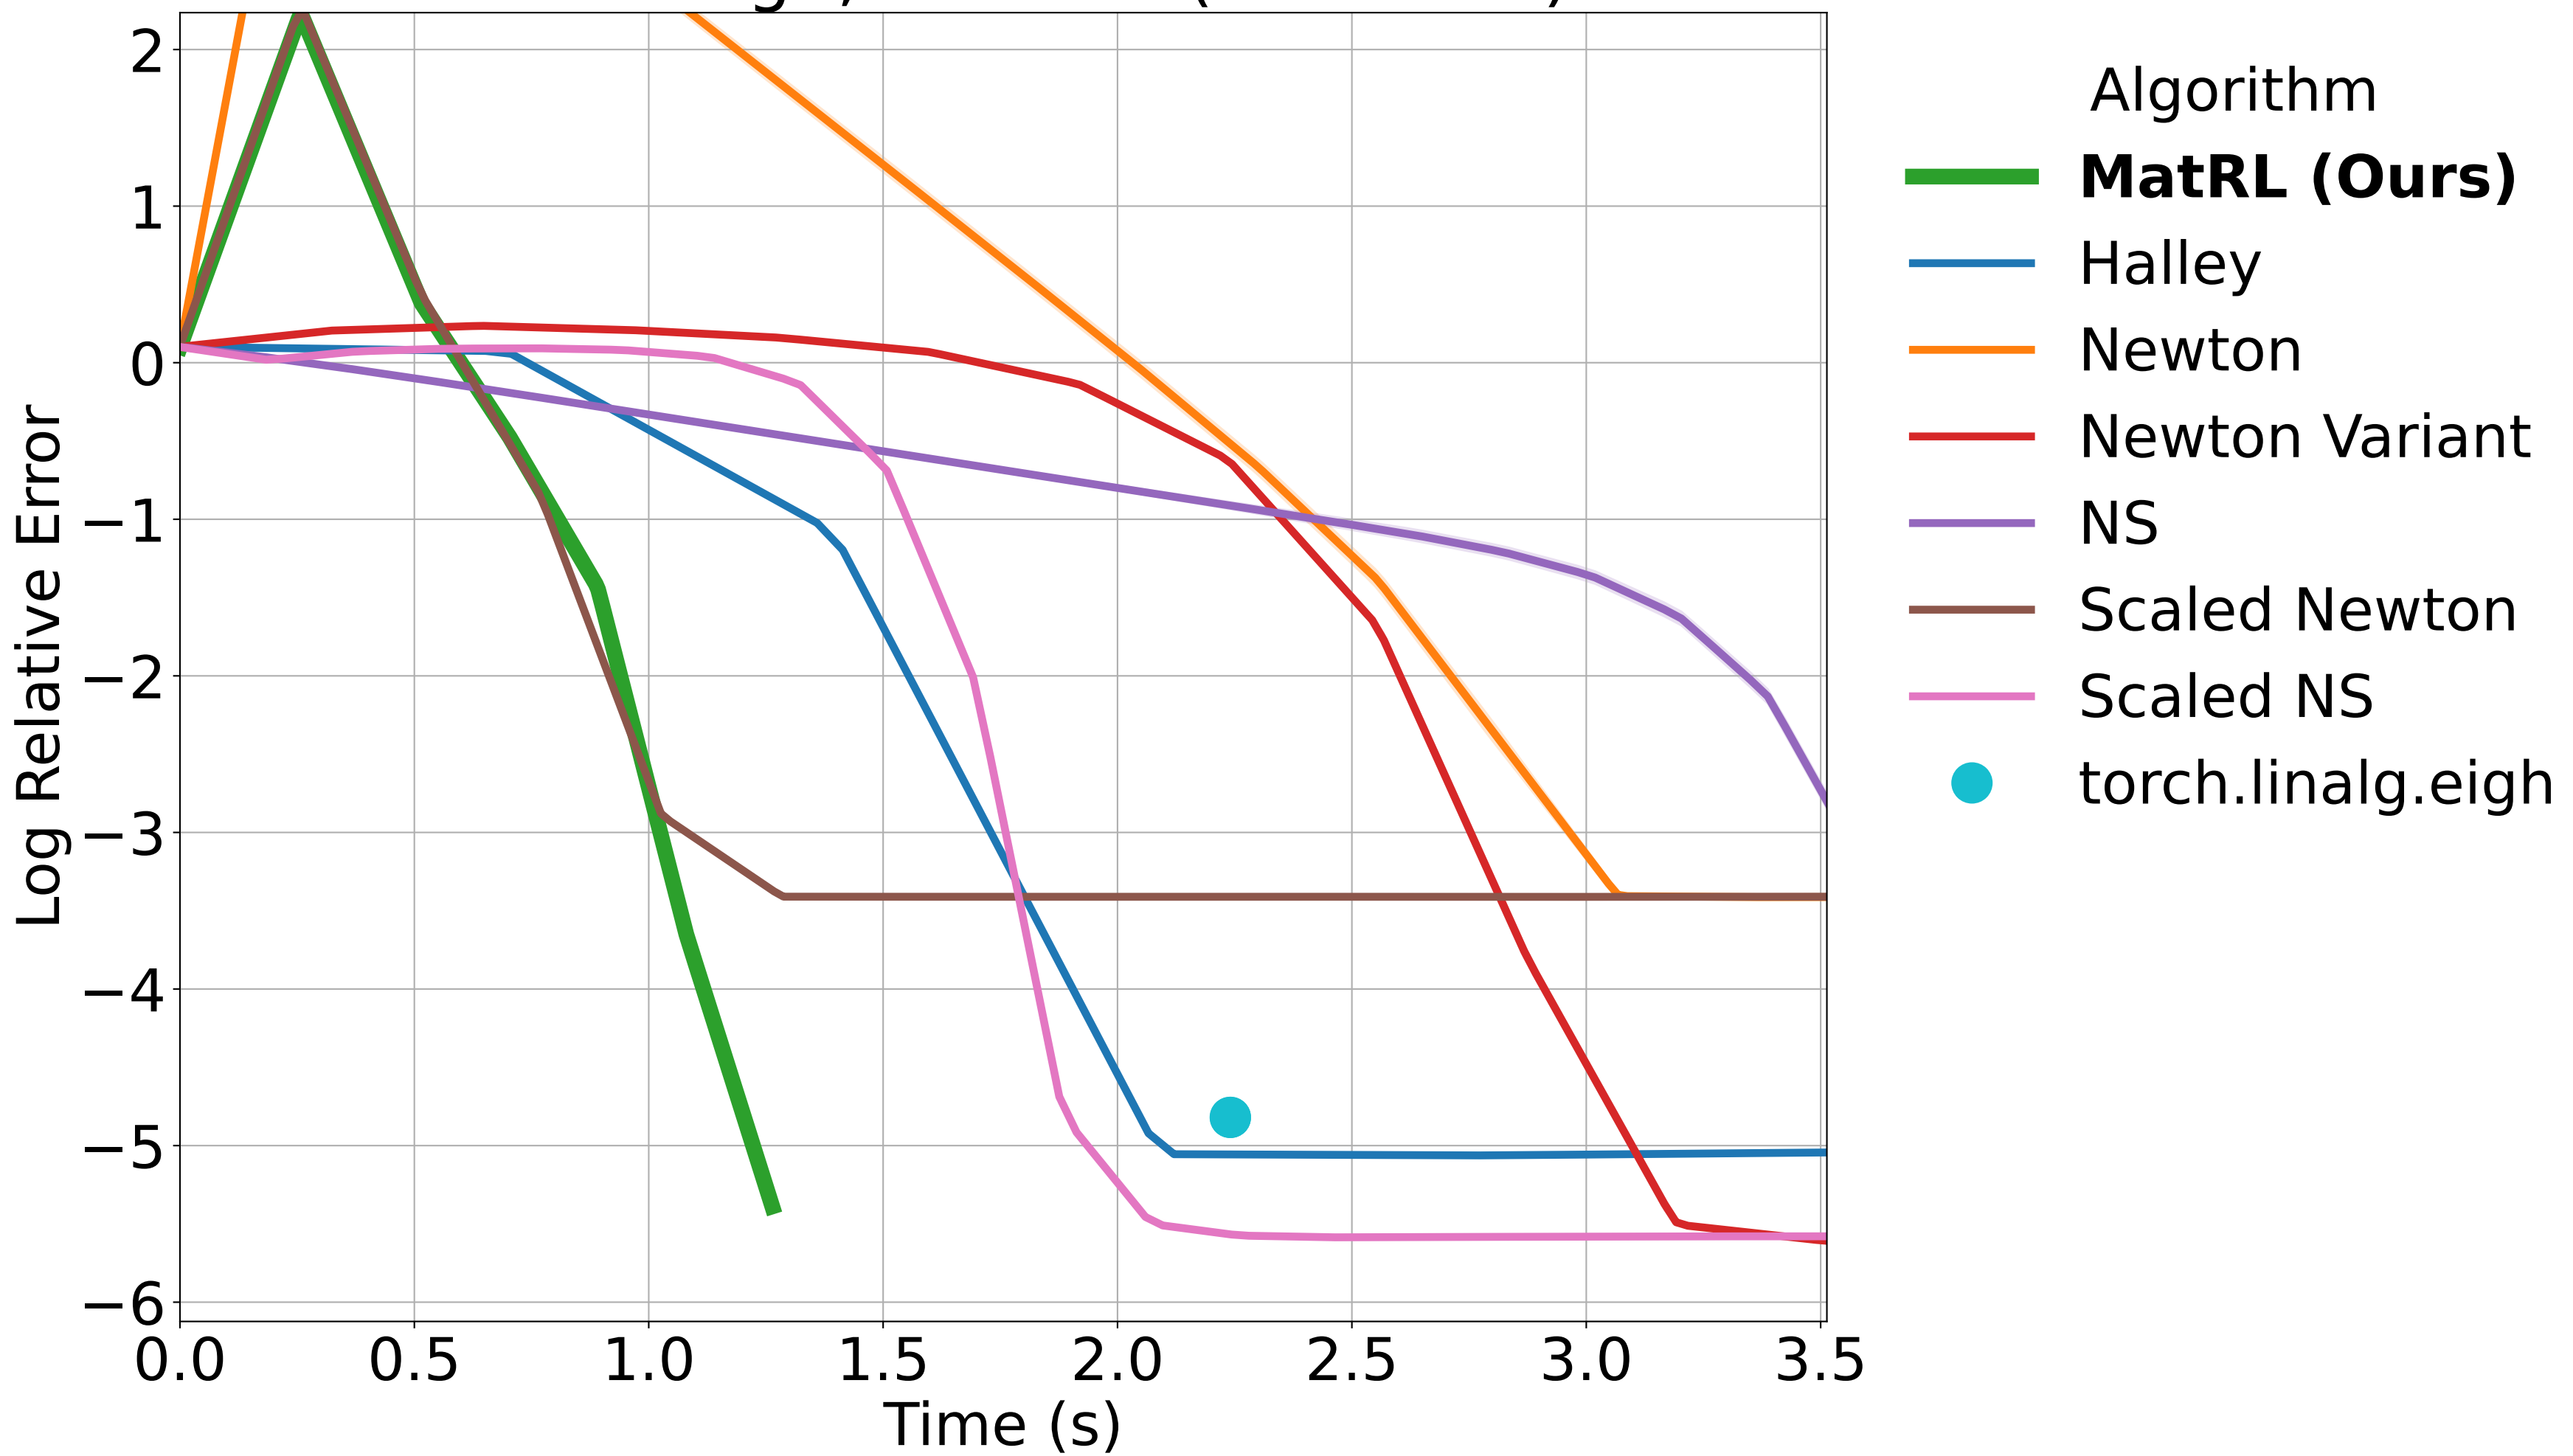

Supplement: supplementary_material [file sign_unif_d=10000.pdf › code/results/sign_d10000/sign_unif_d=10000.pdf]

Matrix Sign, Uniform (d=1500)

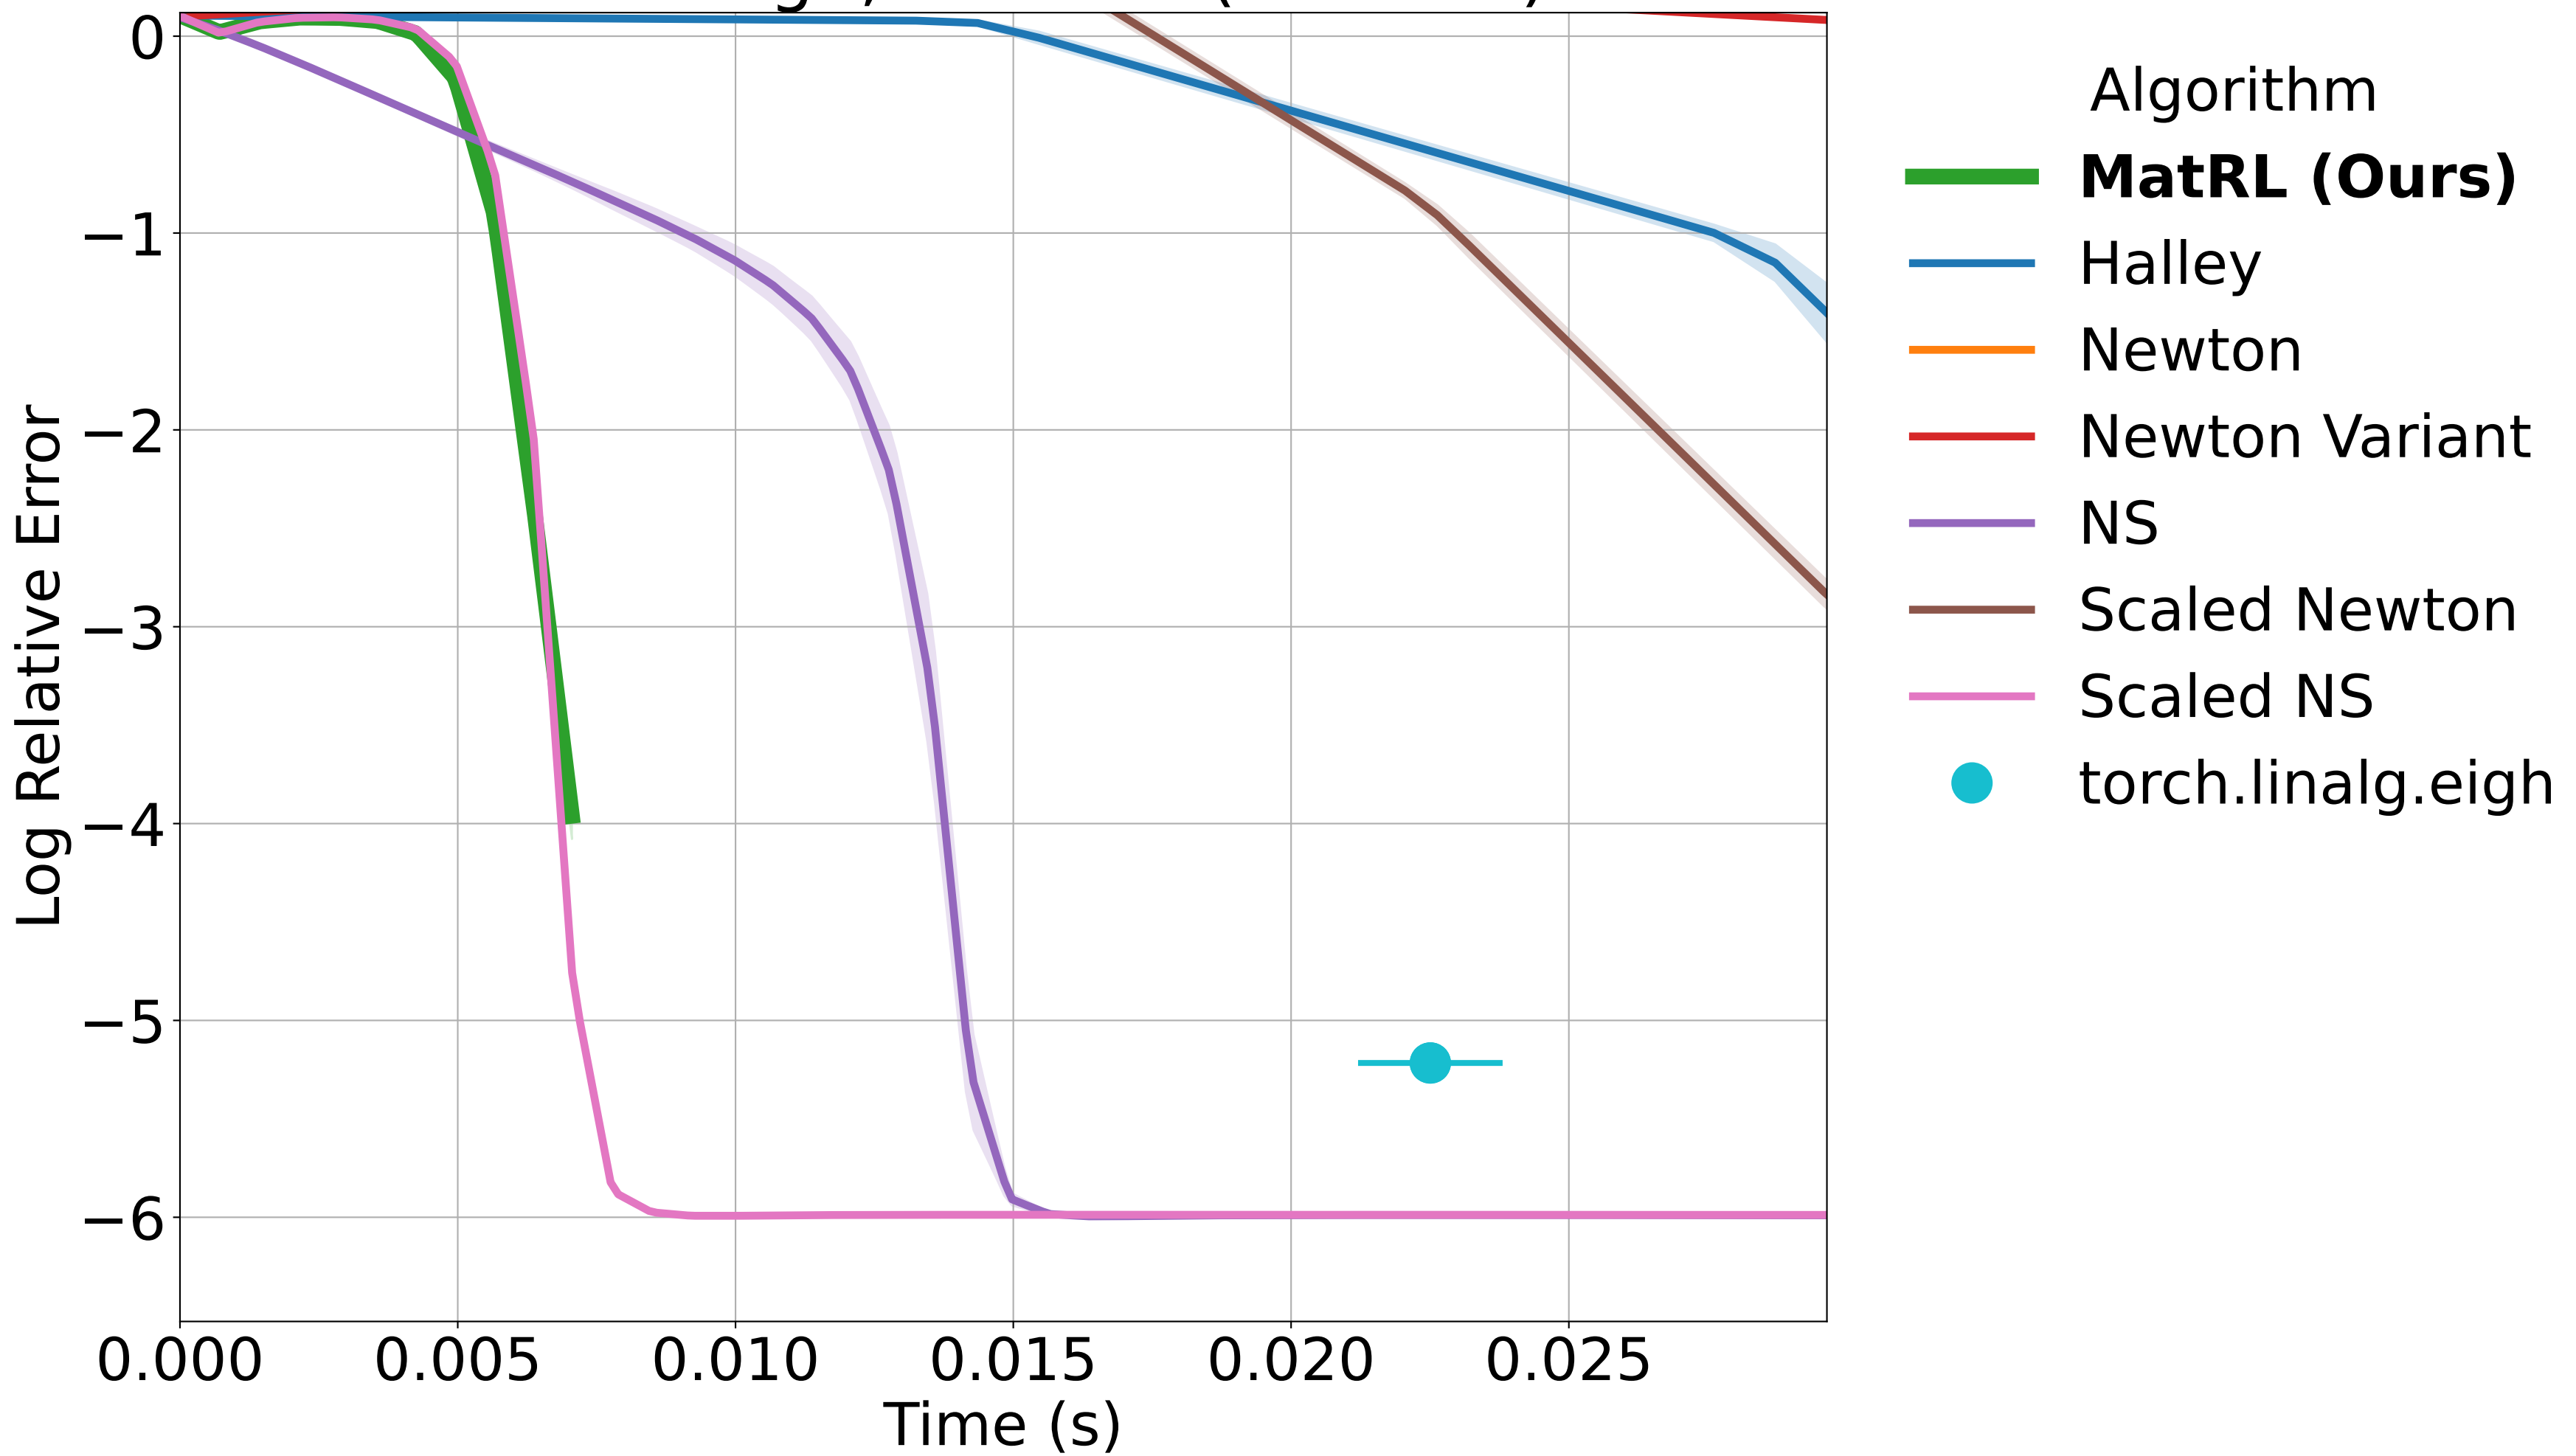

Supplement: supplementary_material [file sign_unif_d=1500.pdf › code/results/sign_d1500/sign_unif_d=1500.pdf]

Matrix Sign, Uniform (d=3000)

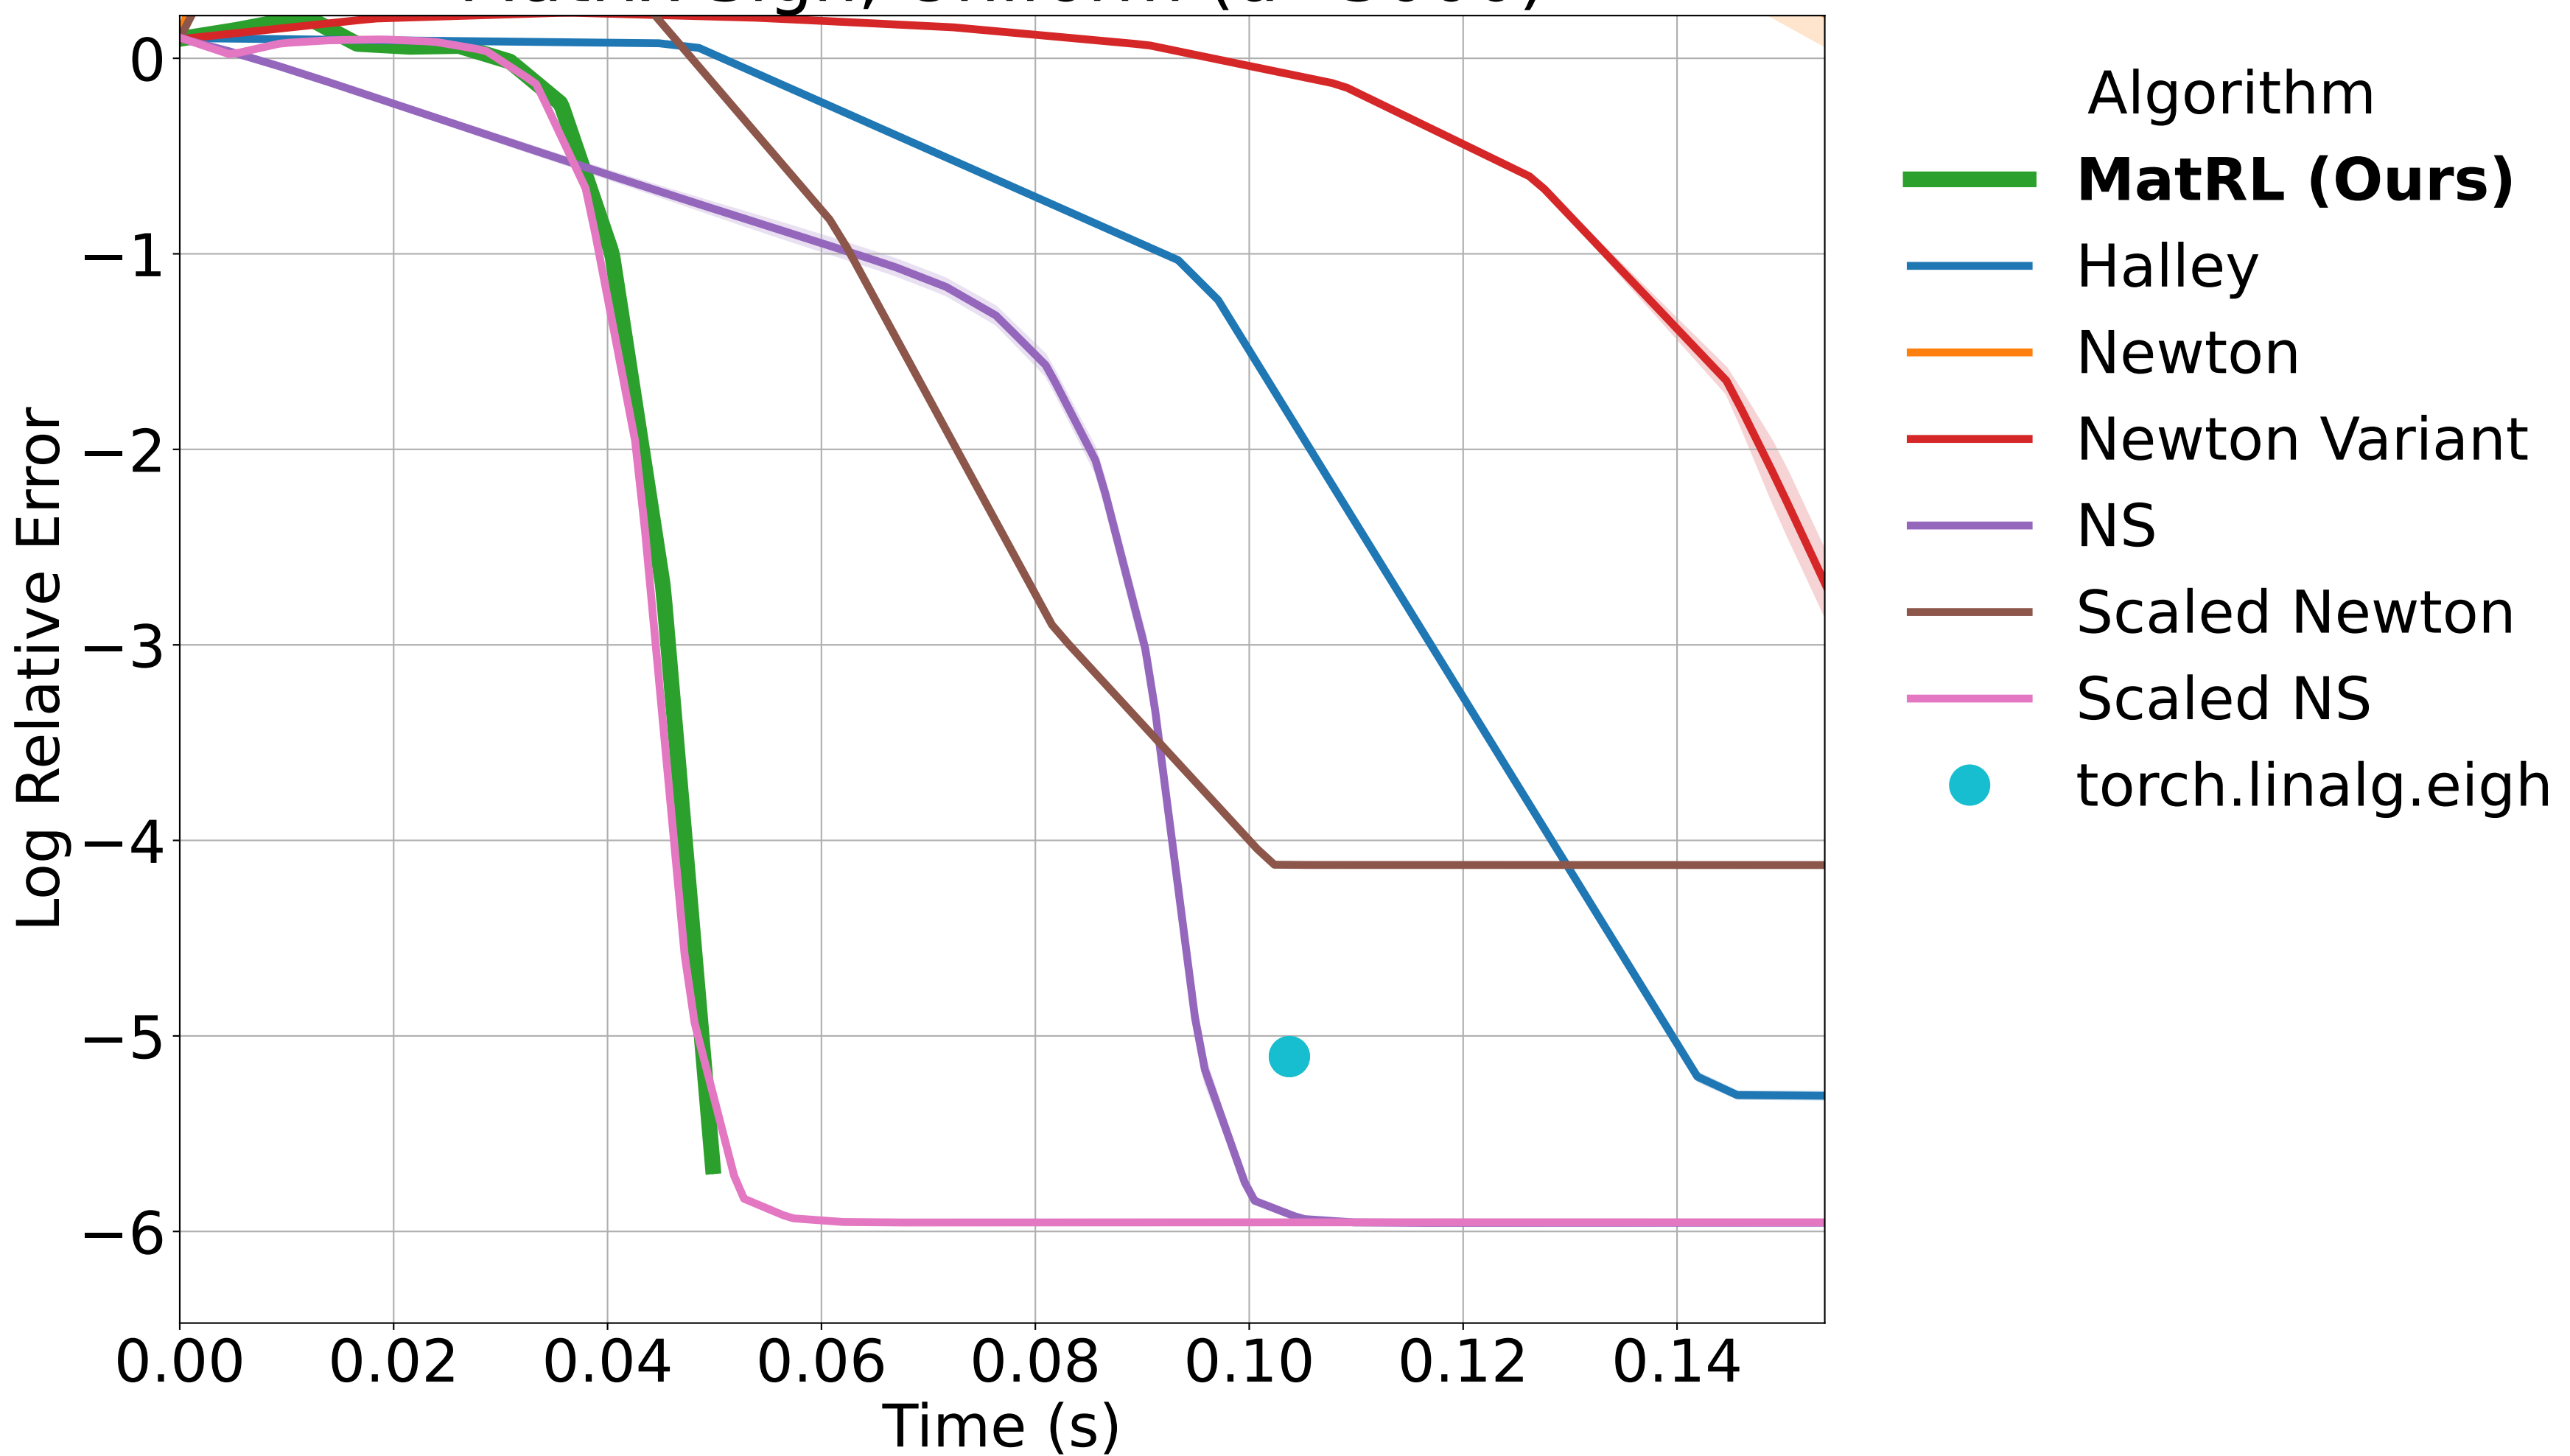

Supplement: supplementary_material [file sign_unif_d=3000.pdf › code/results/sign_d3000/sign_unif_d=3000.pdf]

# Matrix Sign, Uniform (d=5000)

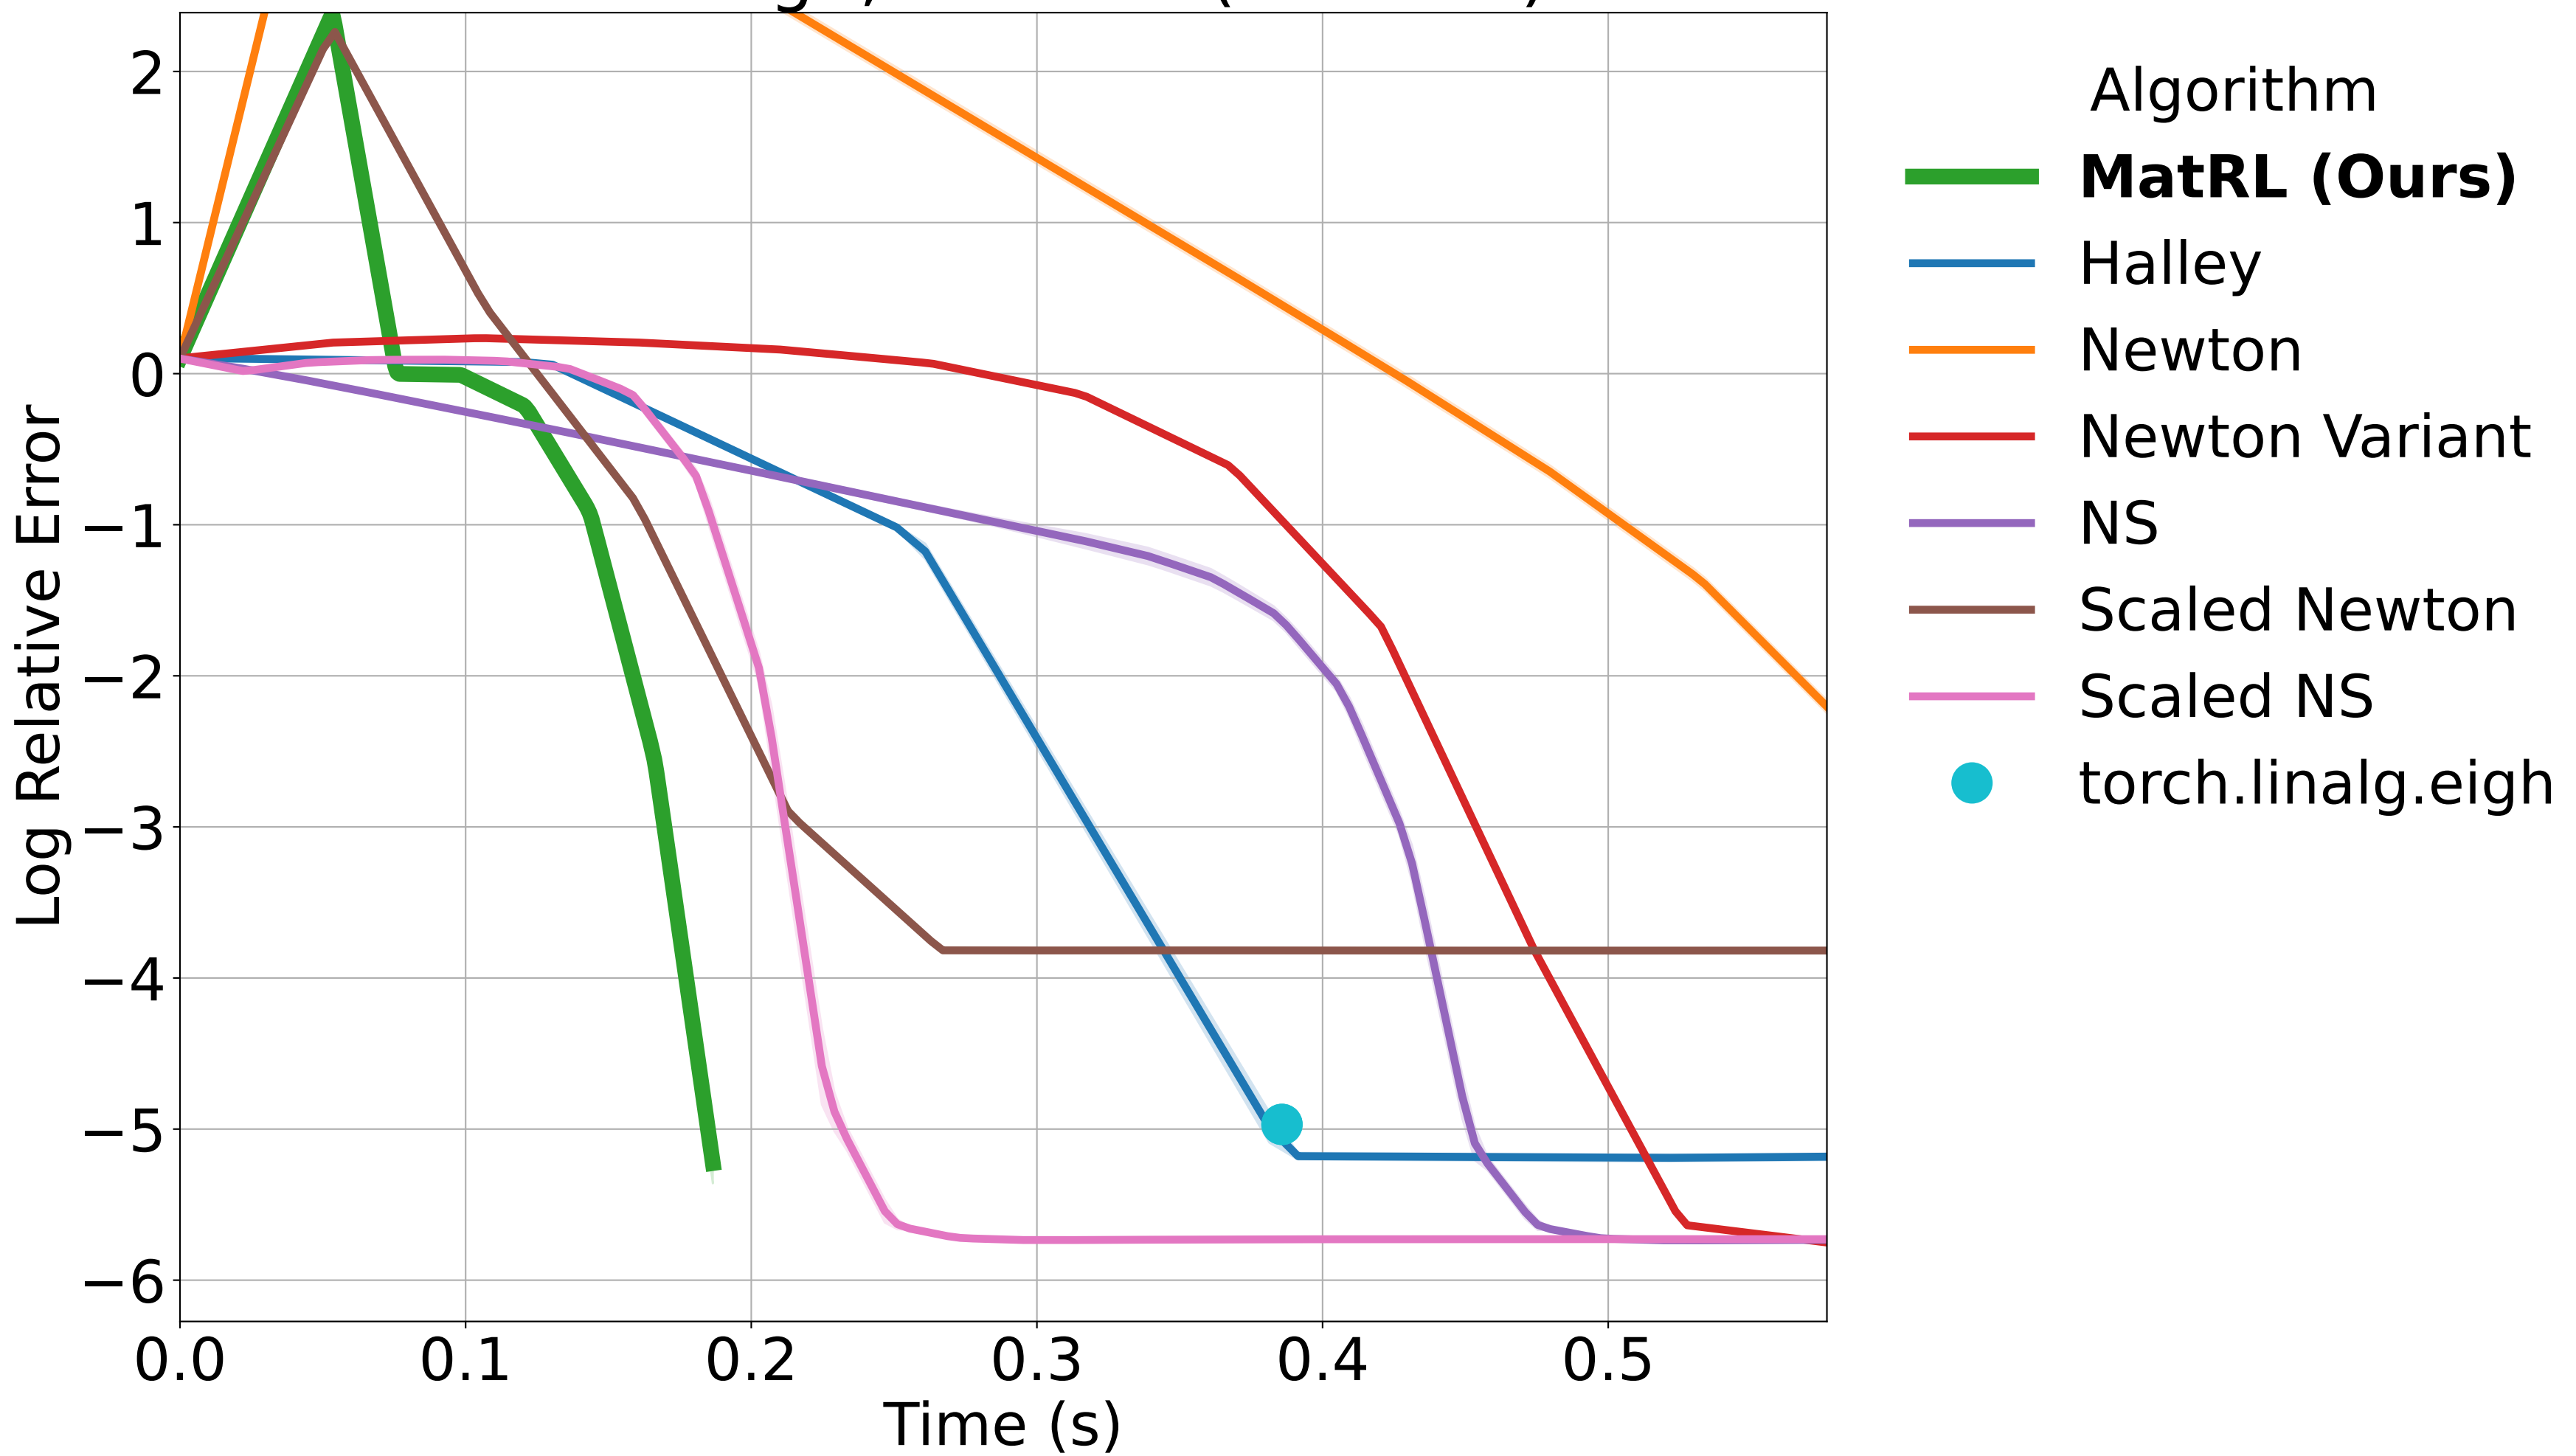

Supplement: supplementary_material [file sign_unif_d=5000.pdf › code/results/sign_d5000/sign_unif_d=5000.pdf]

Matrix Sign, Uniform (d=5000)

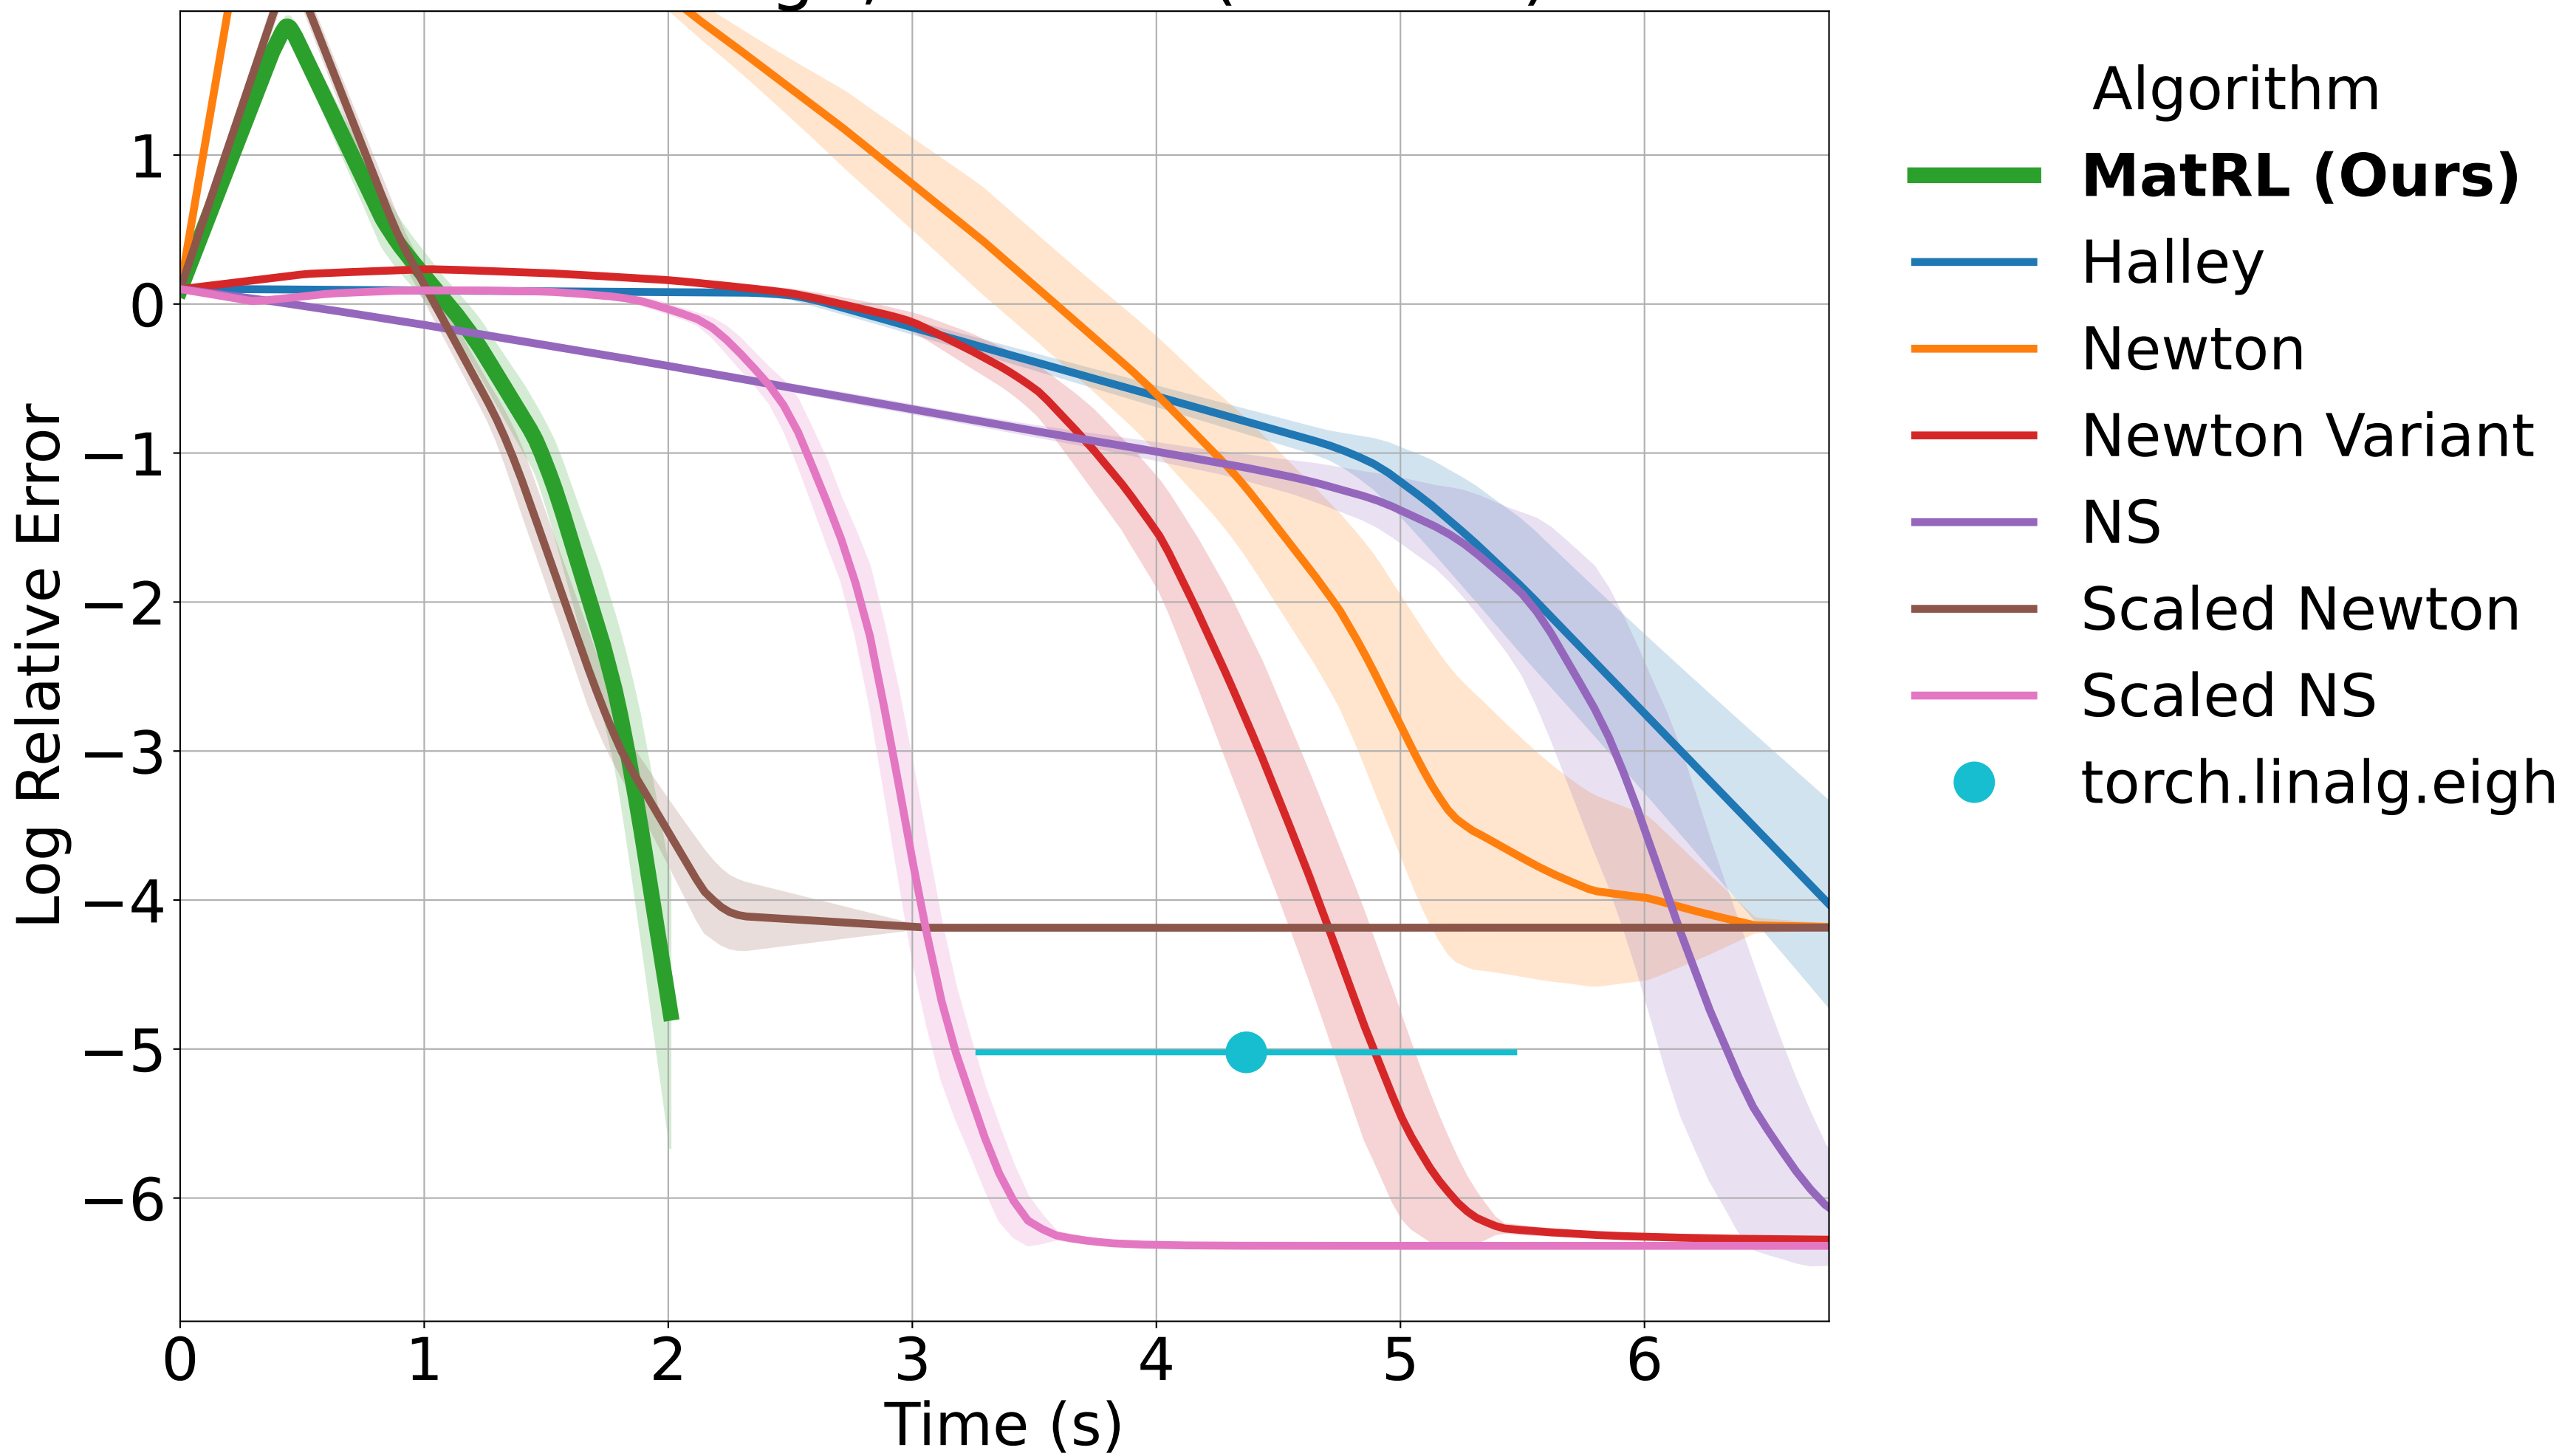

Supplement: supplementary_material [file sign_unif_d=5000.pdf › code/results/sign_d5000_cpu/sign_unif_d=5000.pdf]

# Matrix Sign, Hessian of Quartic (d=5000)

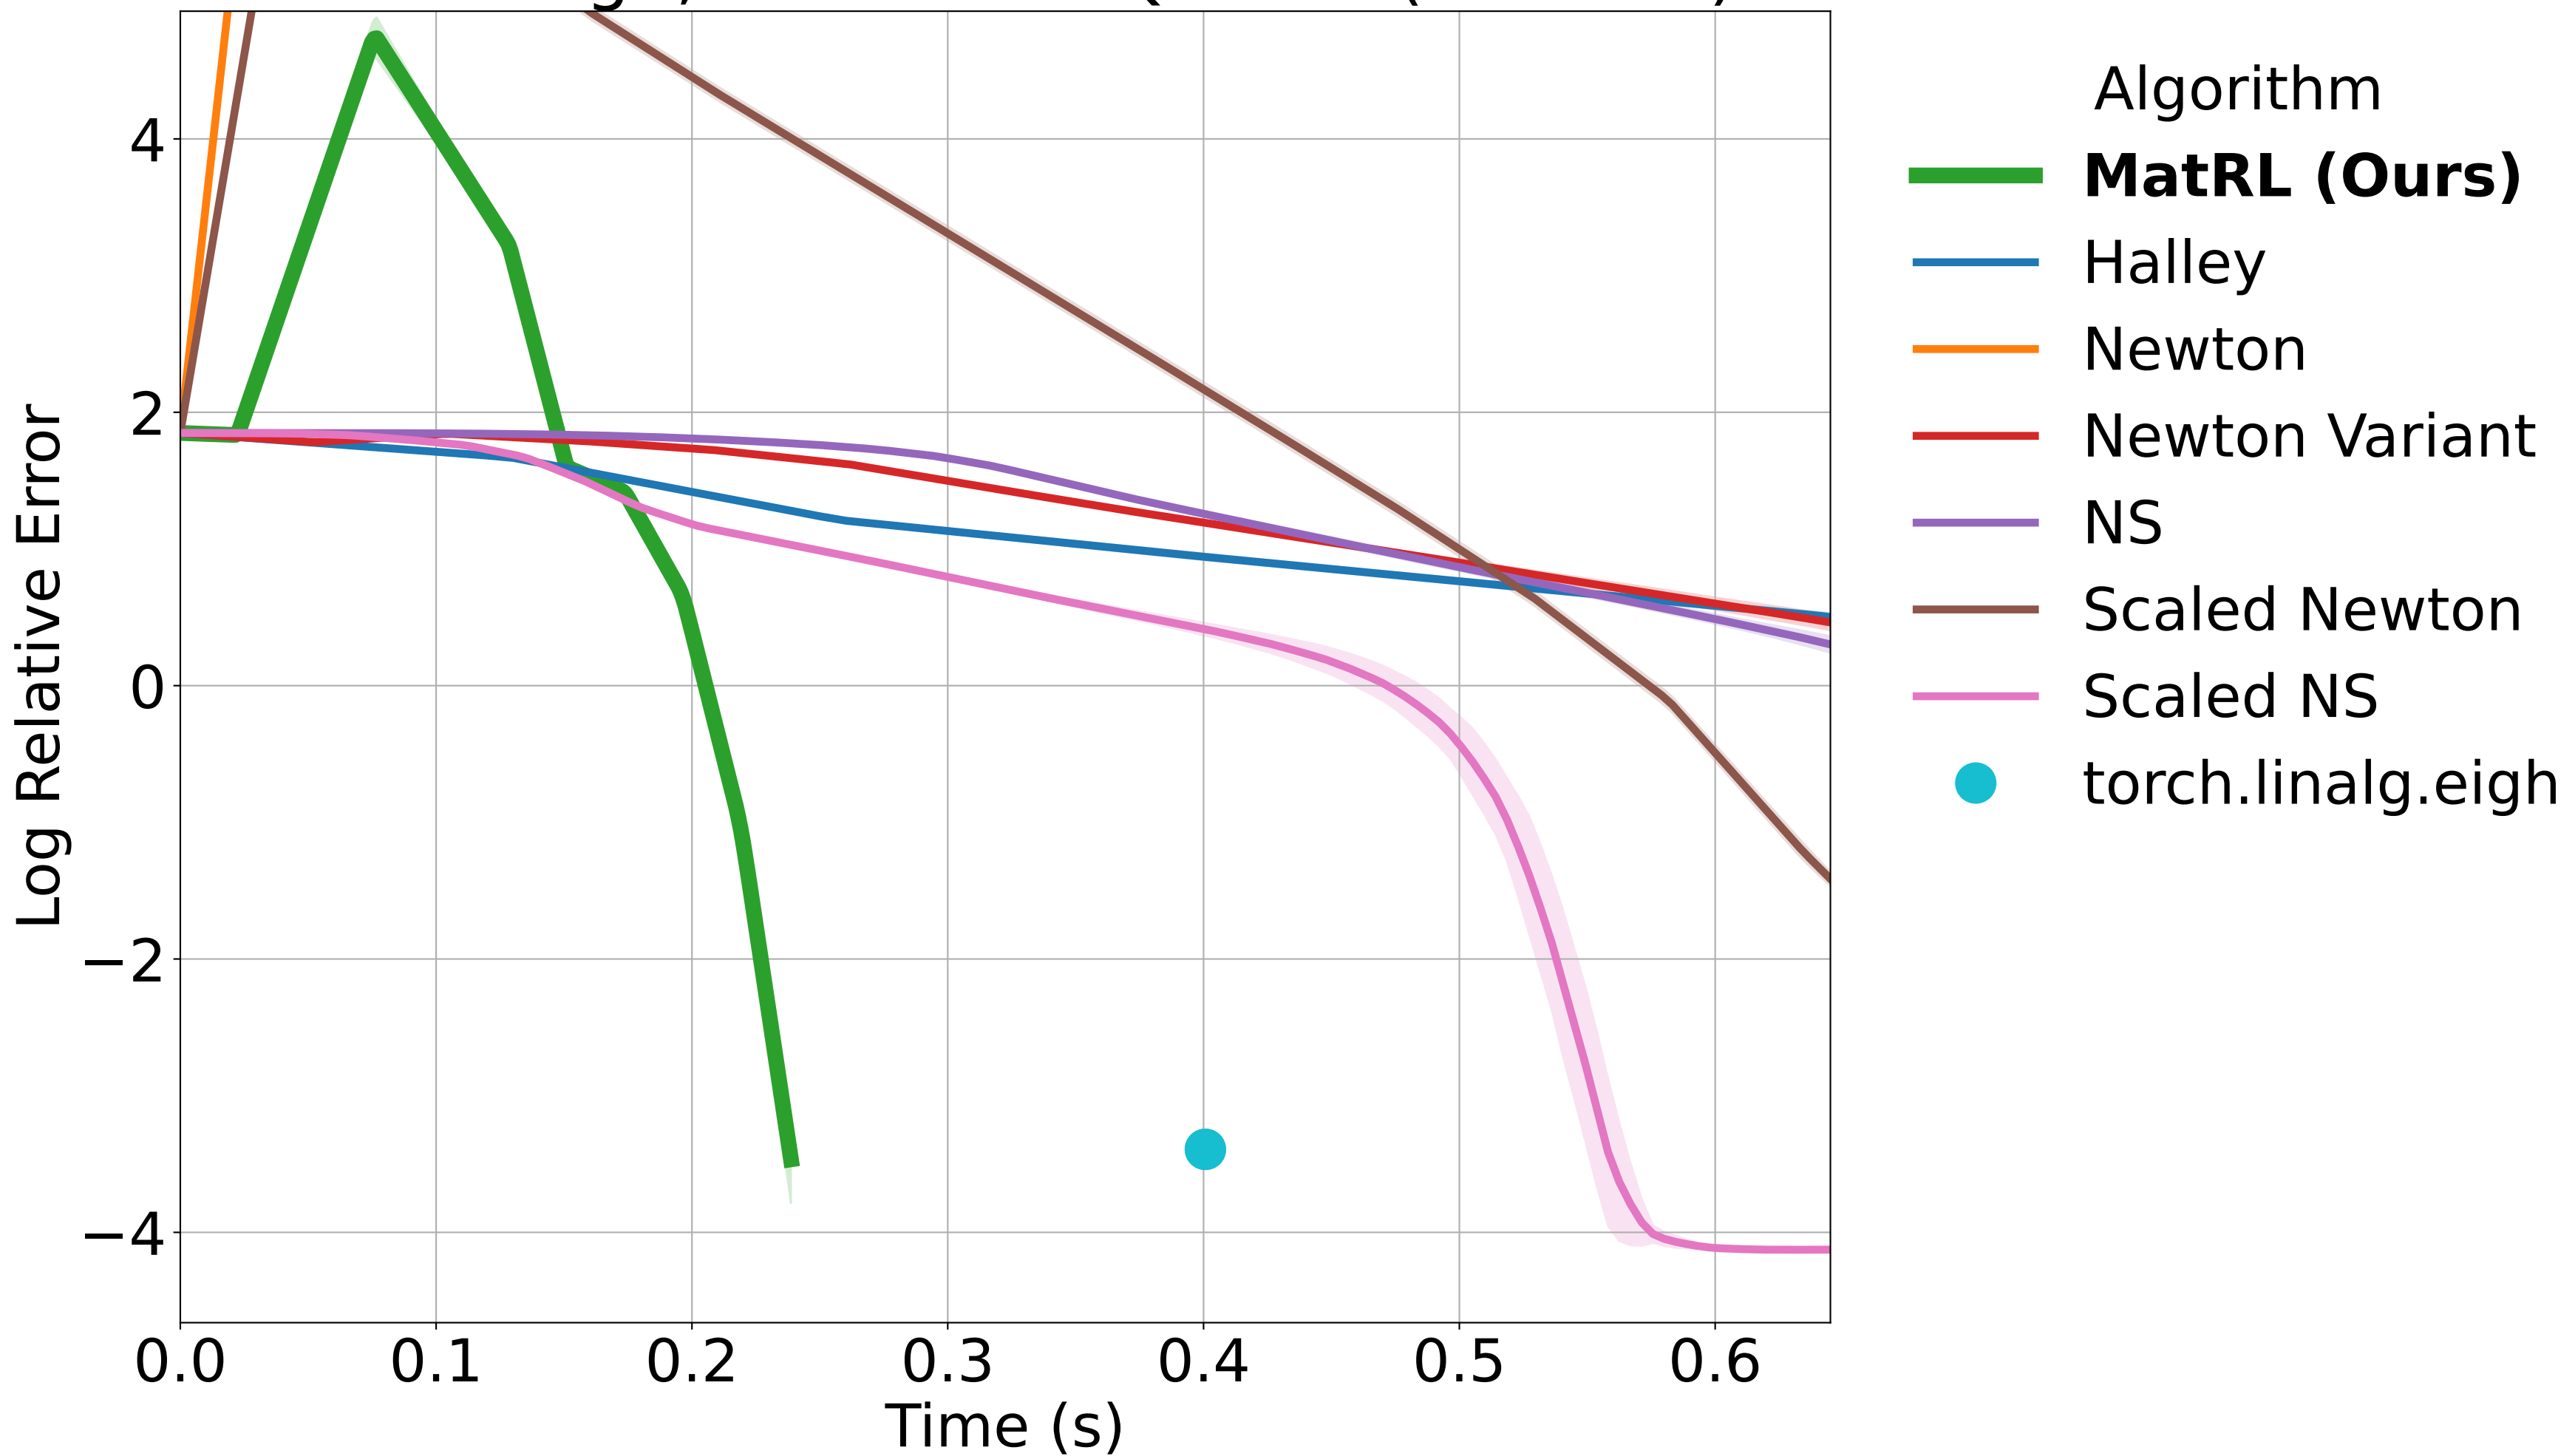

Supplement: supplementary_material [file sign_quartic_saddle_d=5000.pdf › code/results/sign_quartic_saddle/sign_quartic_saddle_d=5000.pdf]

# Matrix Square Root, CIFAR-10 (d=3072)

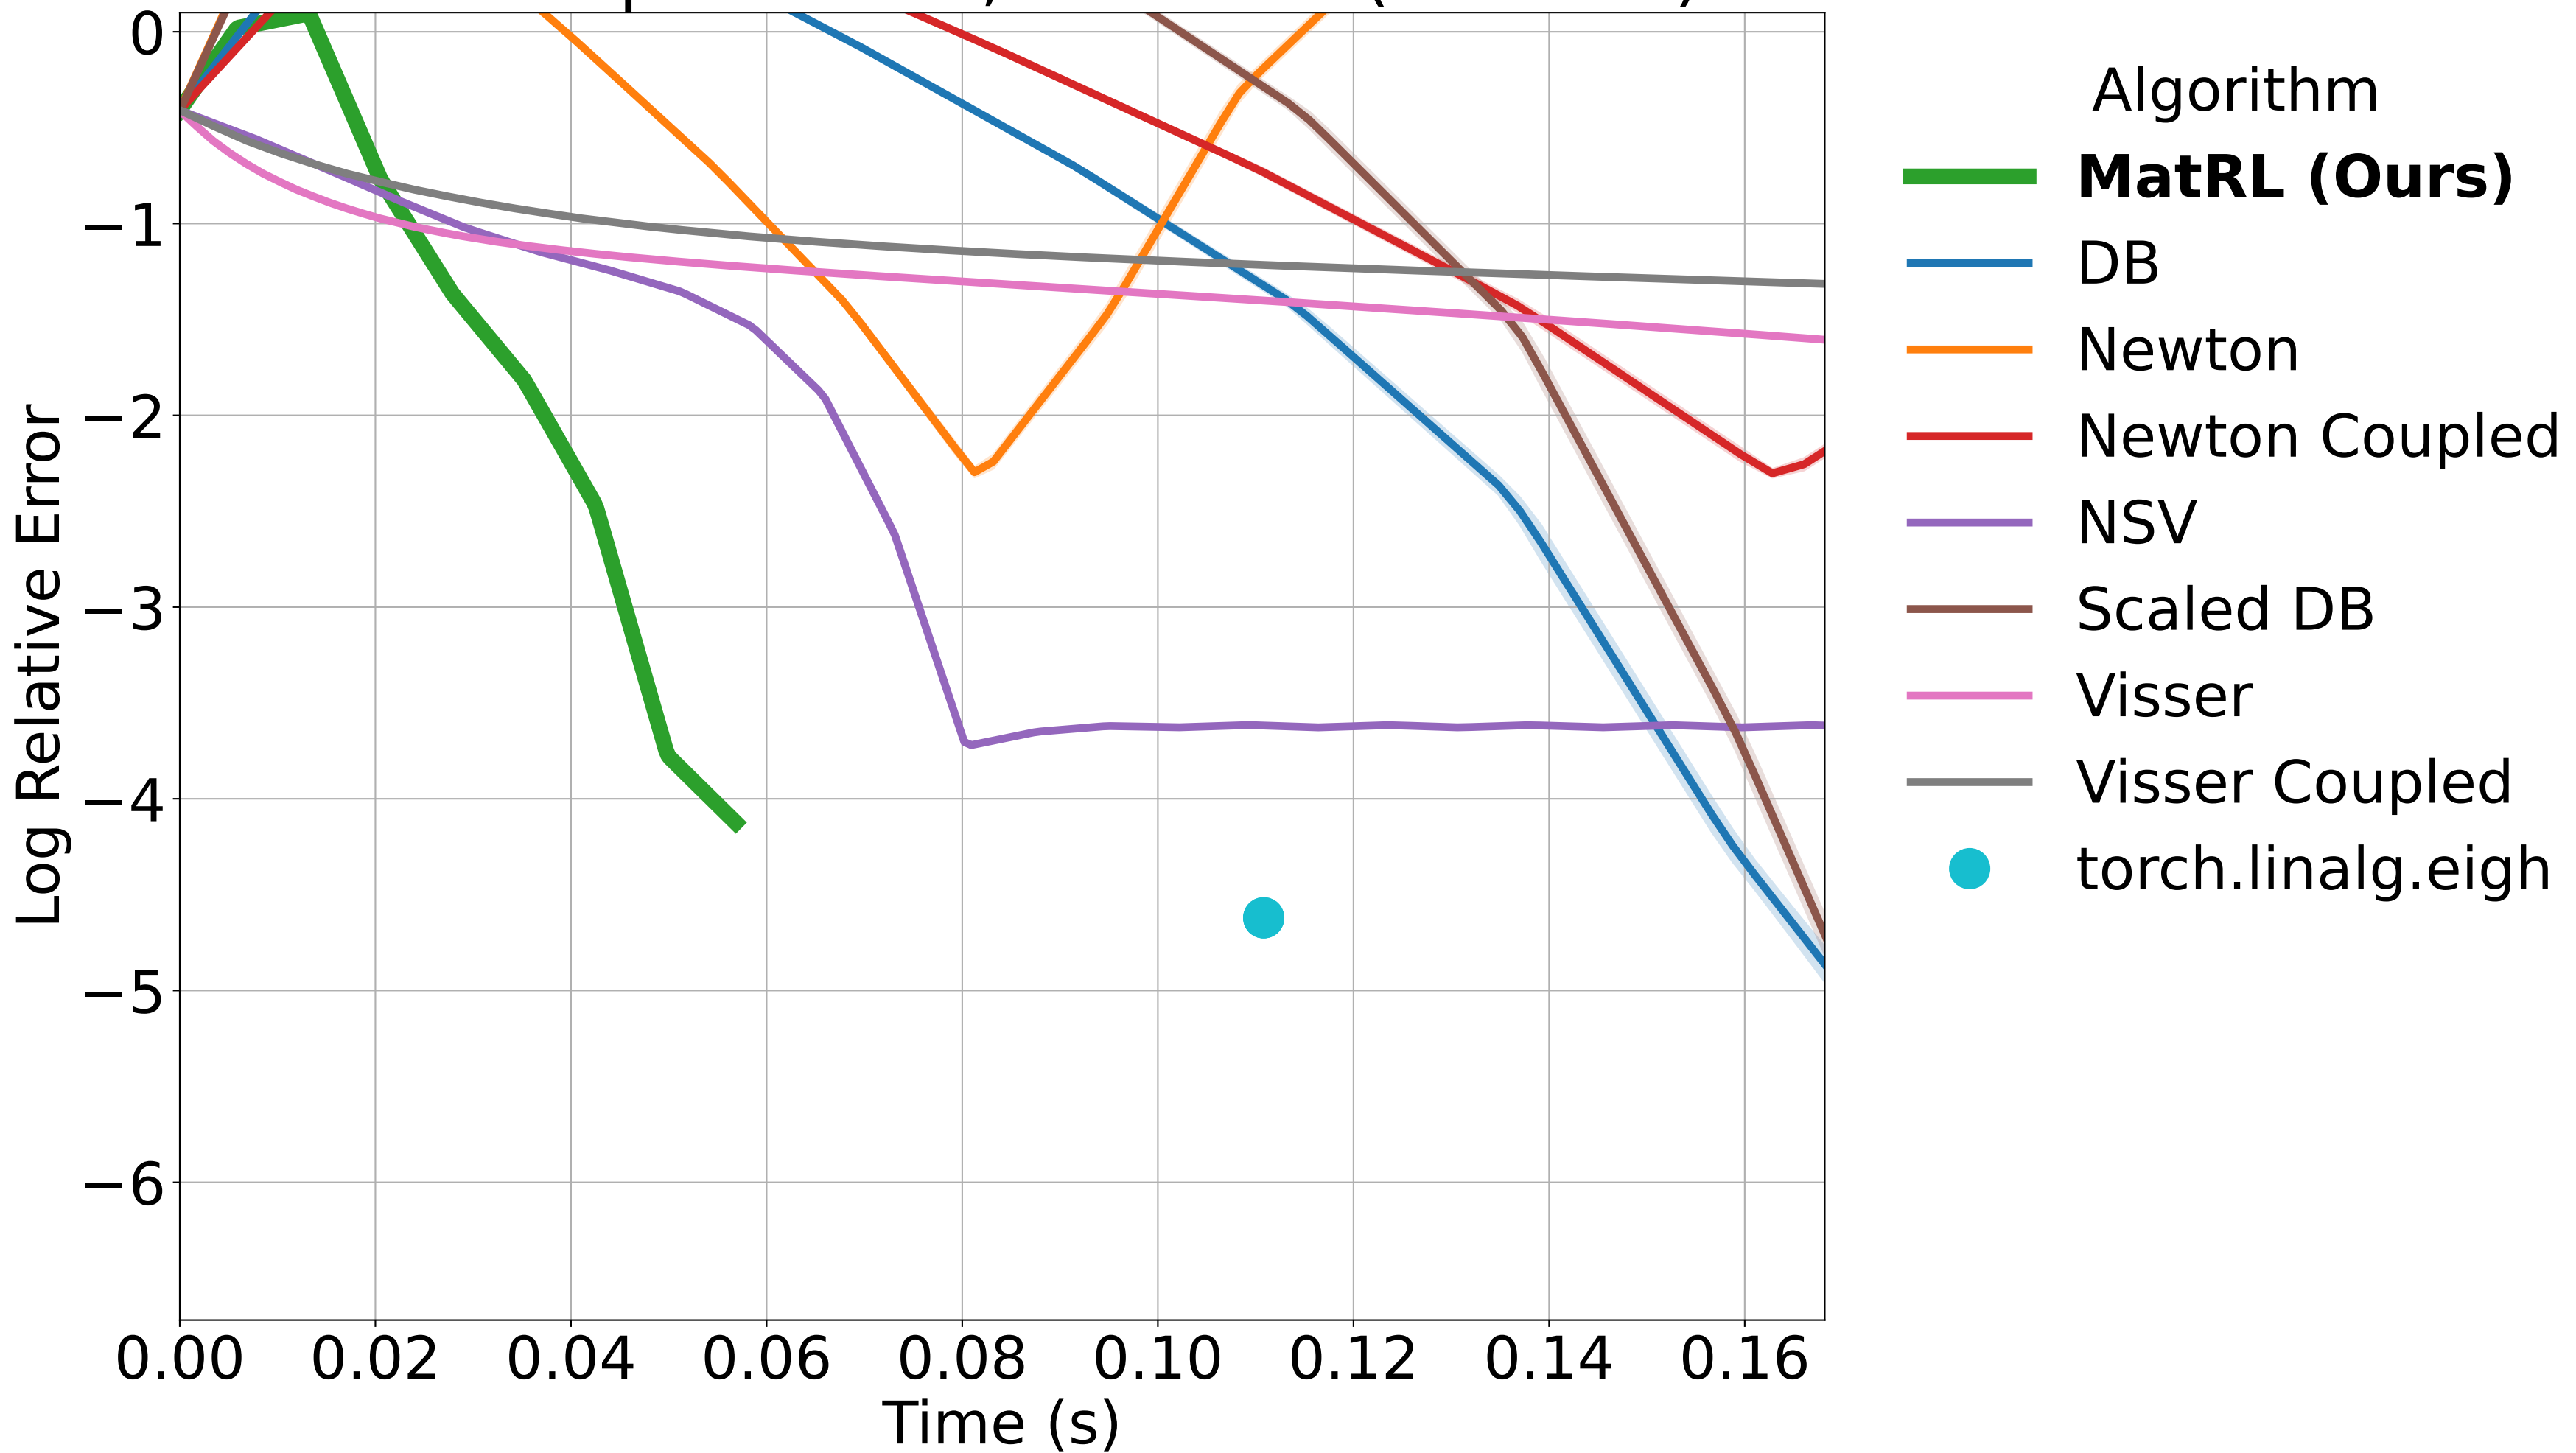

Supplement: supplementary_material [file sqrt_CIFAR_d=3072.pdf › code/results/sqrt_cifar/sqrt_CIFAR_d=3072.pdf]

# Matrix Square Root, CIFAR-10 (d=3072)

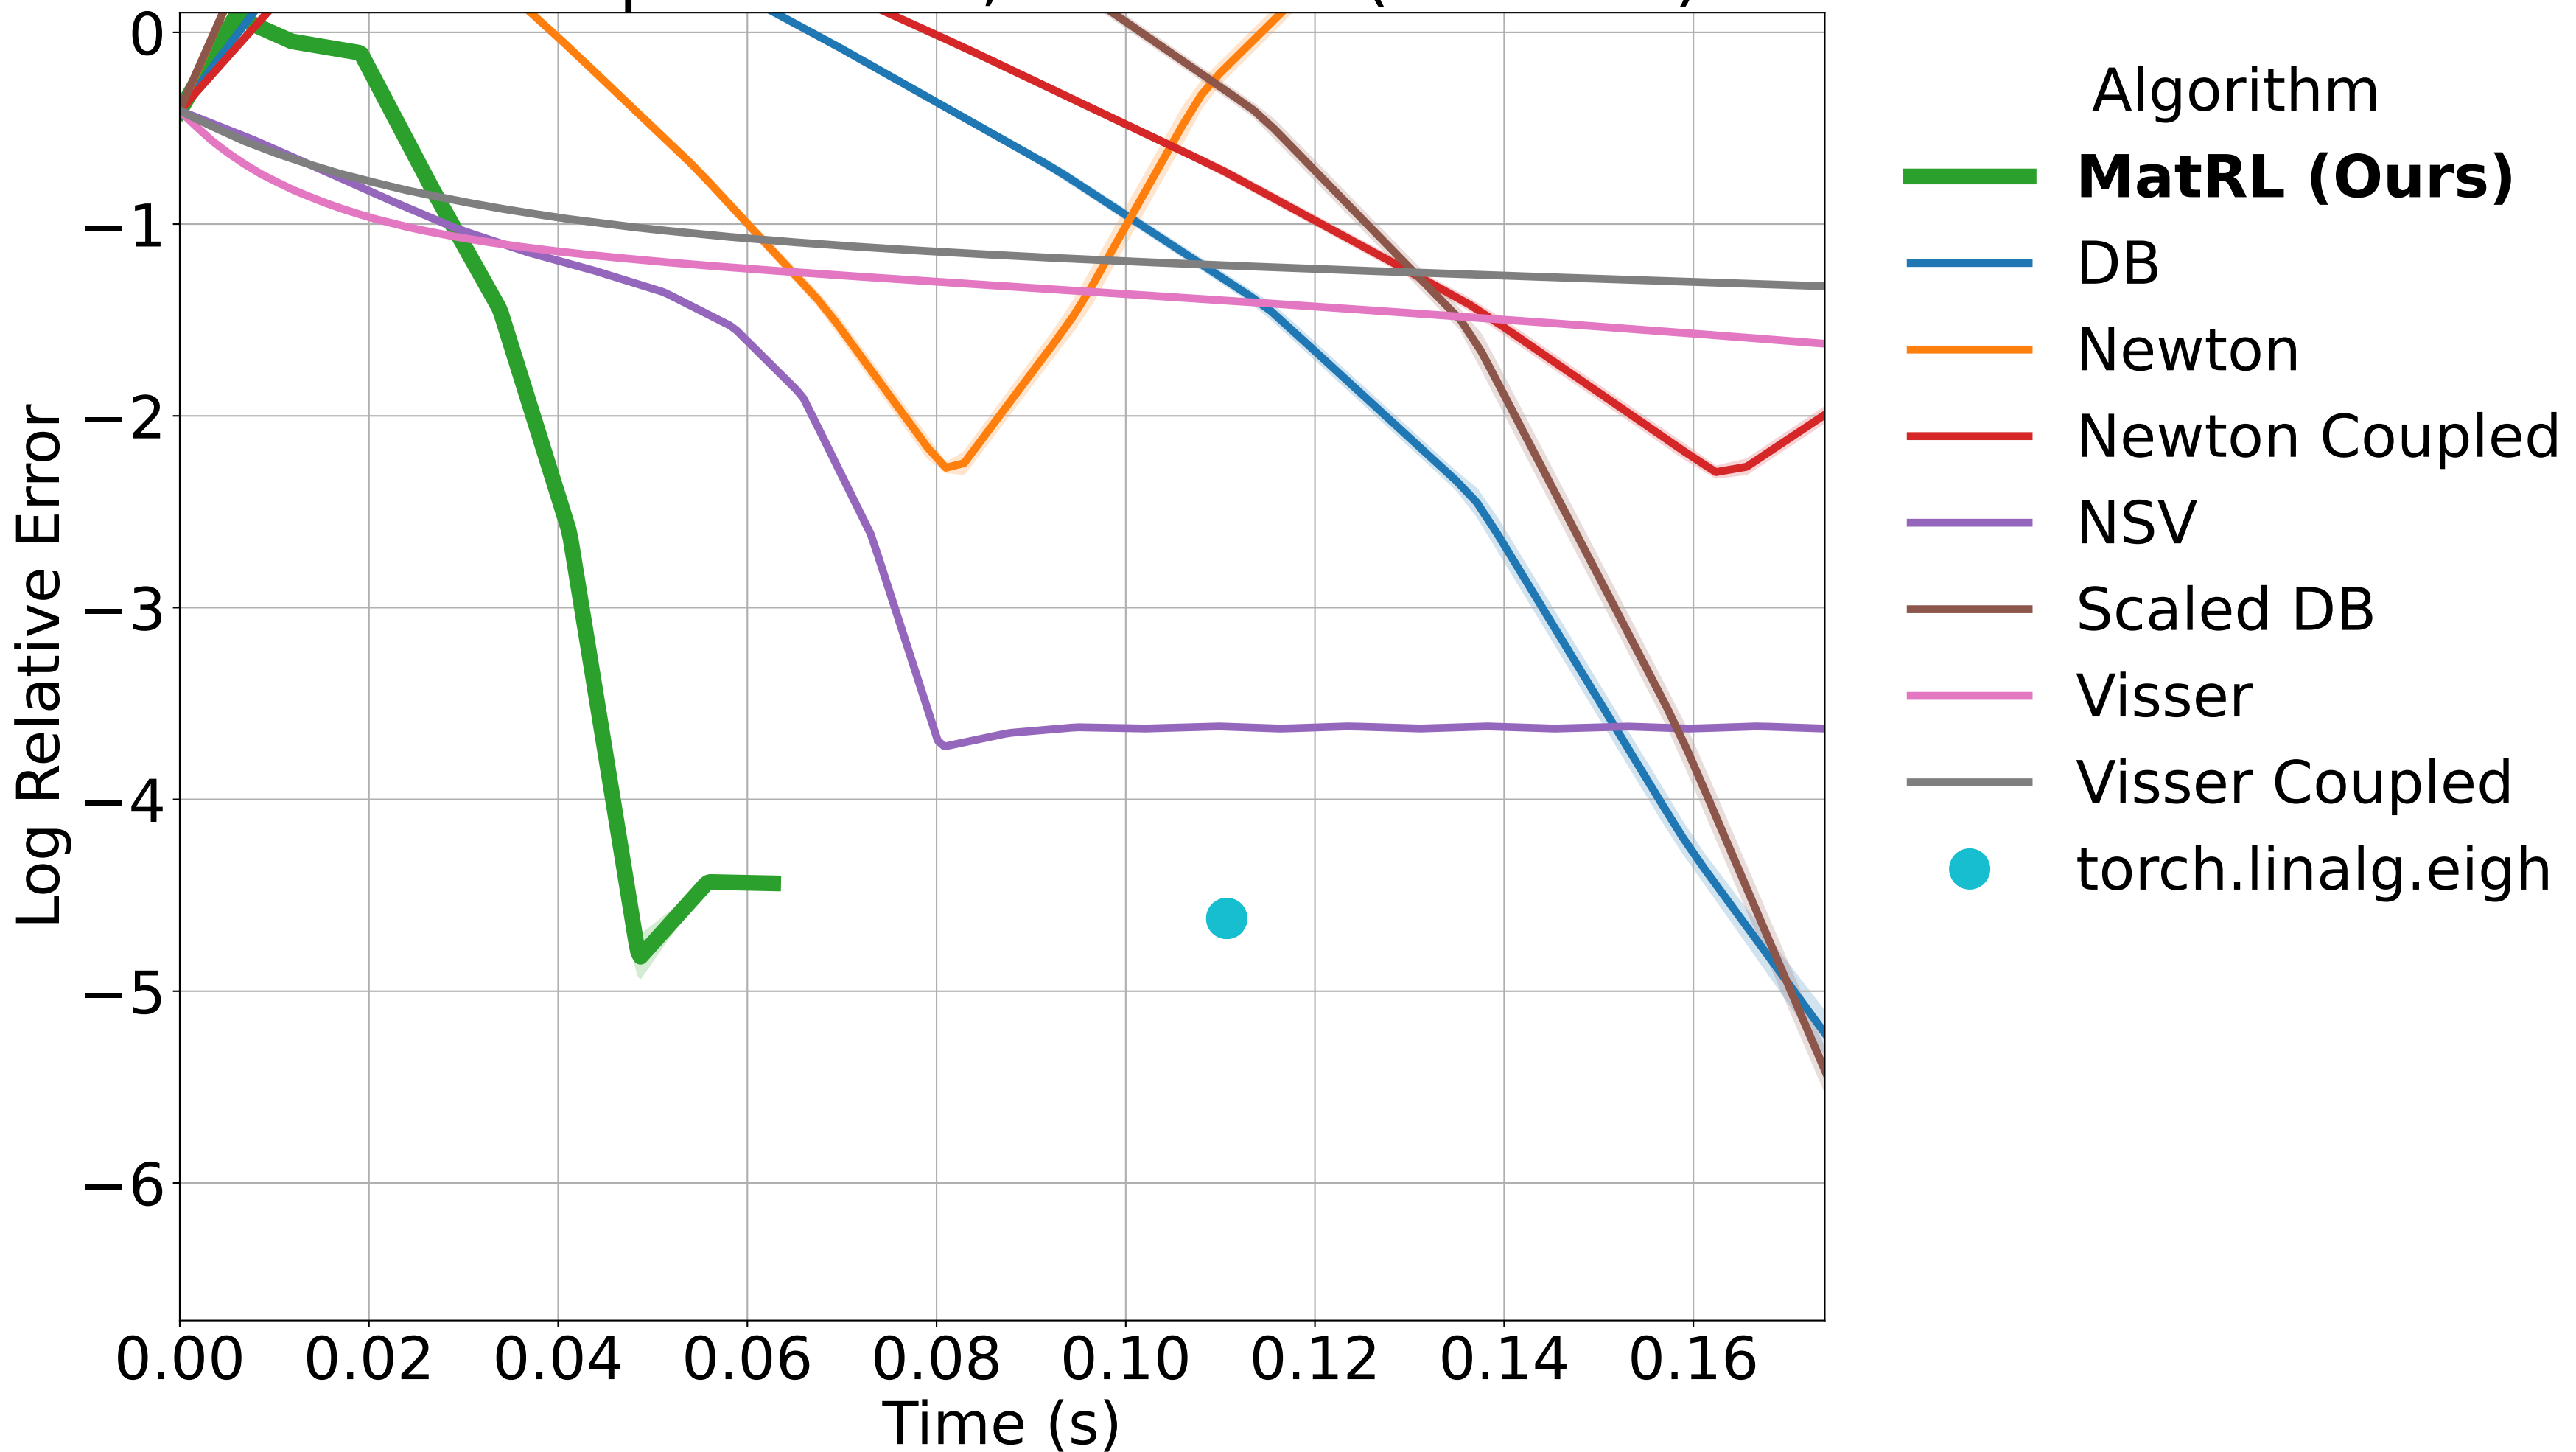

Supplement: supplementary_material [file sqrt_CIFAR_d=3072.pdf › code/results/sqrt_cifar_1e-11/sqrt_CIFAR_d=3072.pdf]

# Matrix Square Root, CIFAR-10 (d=3072)

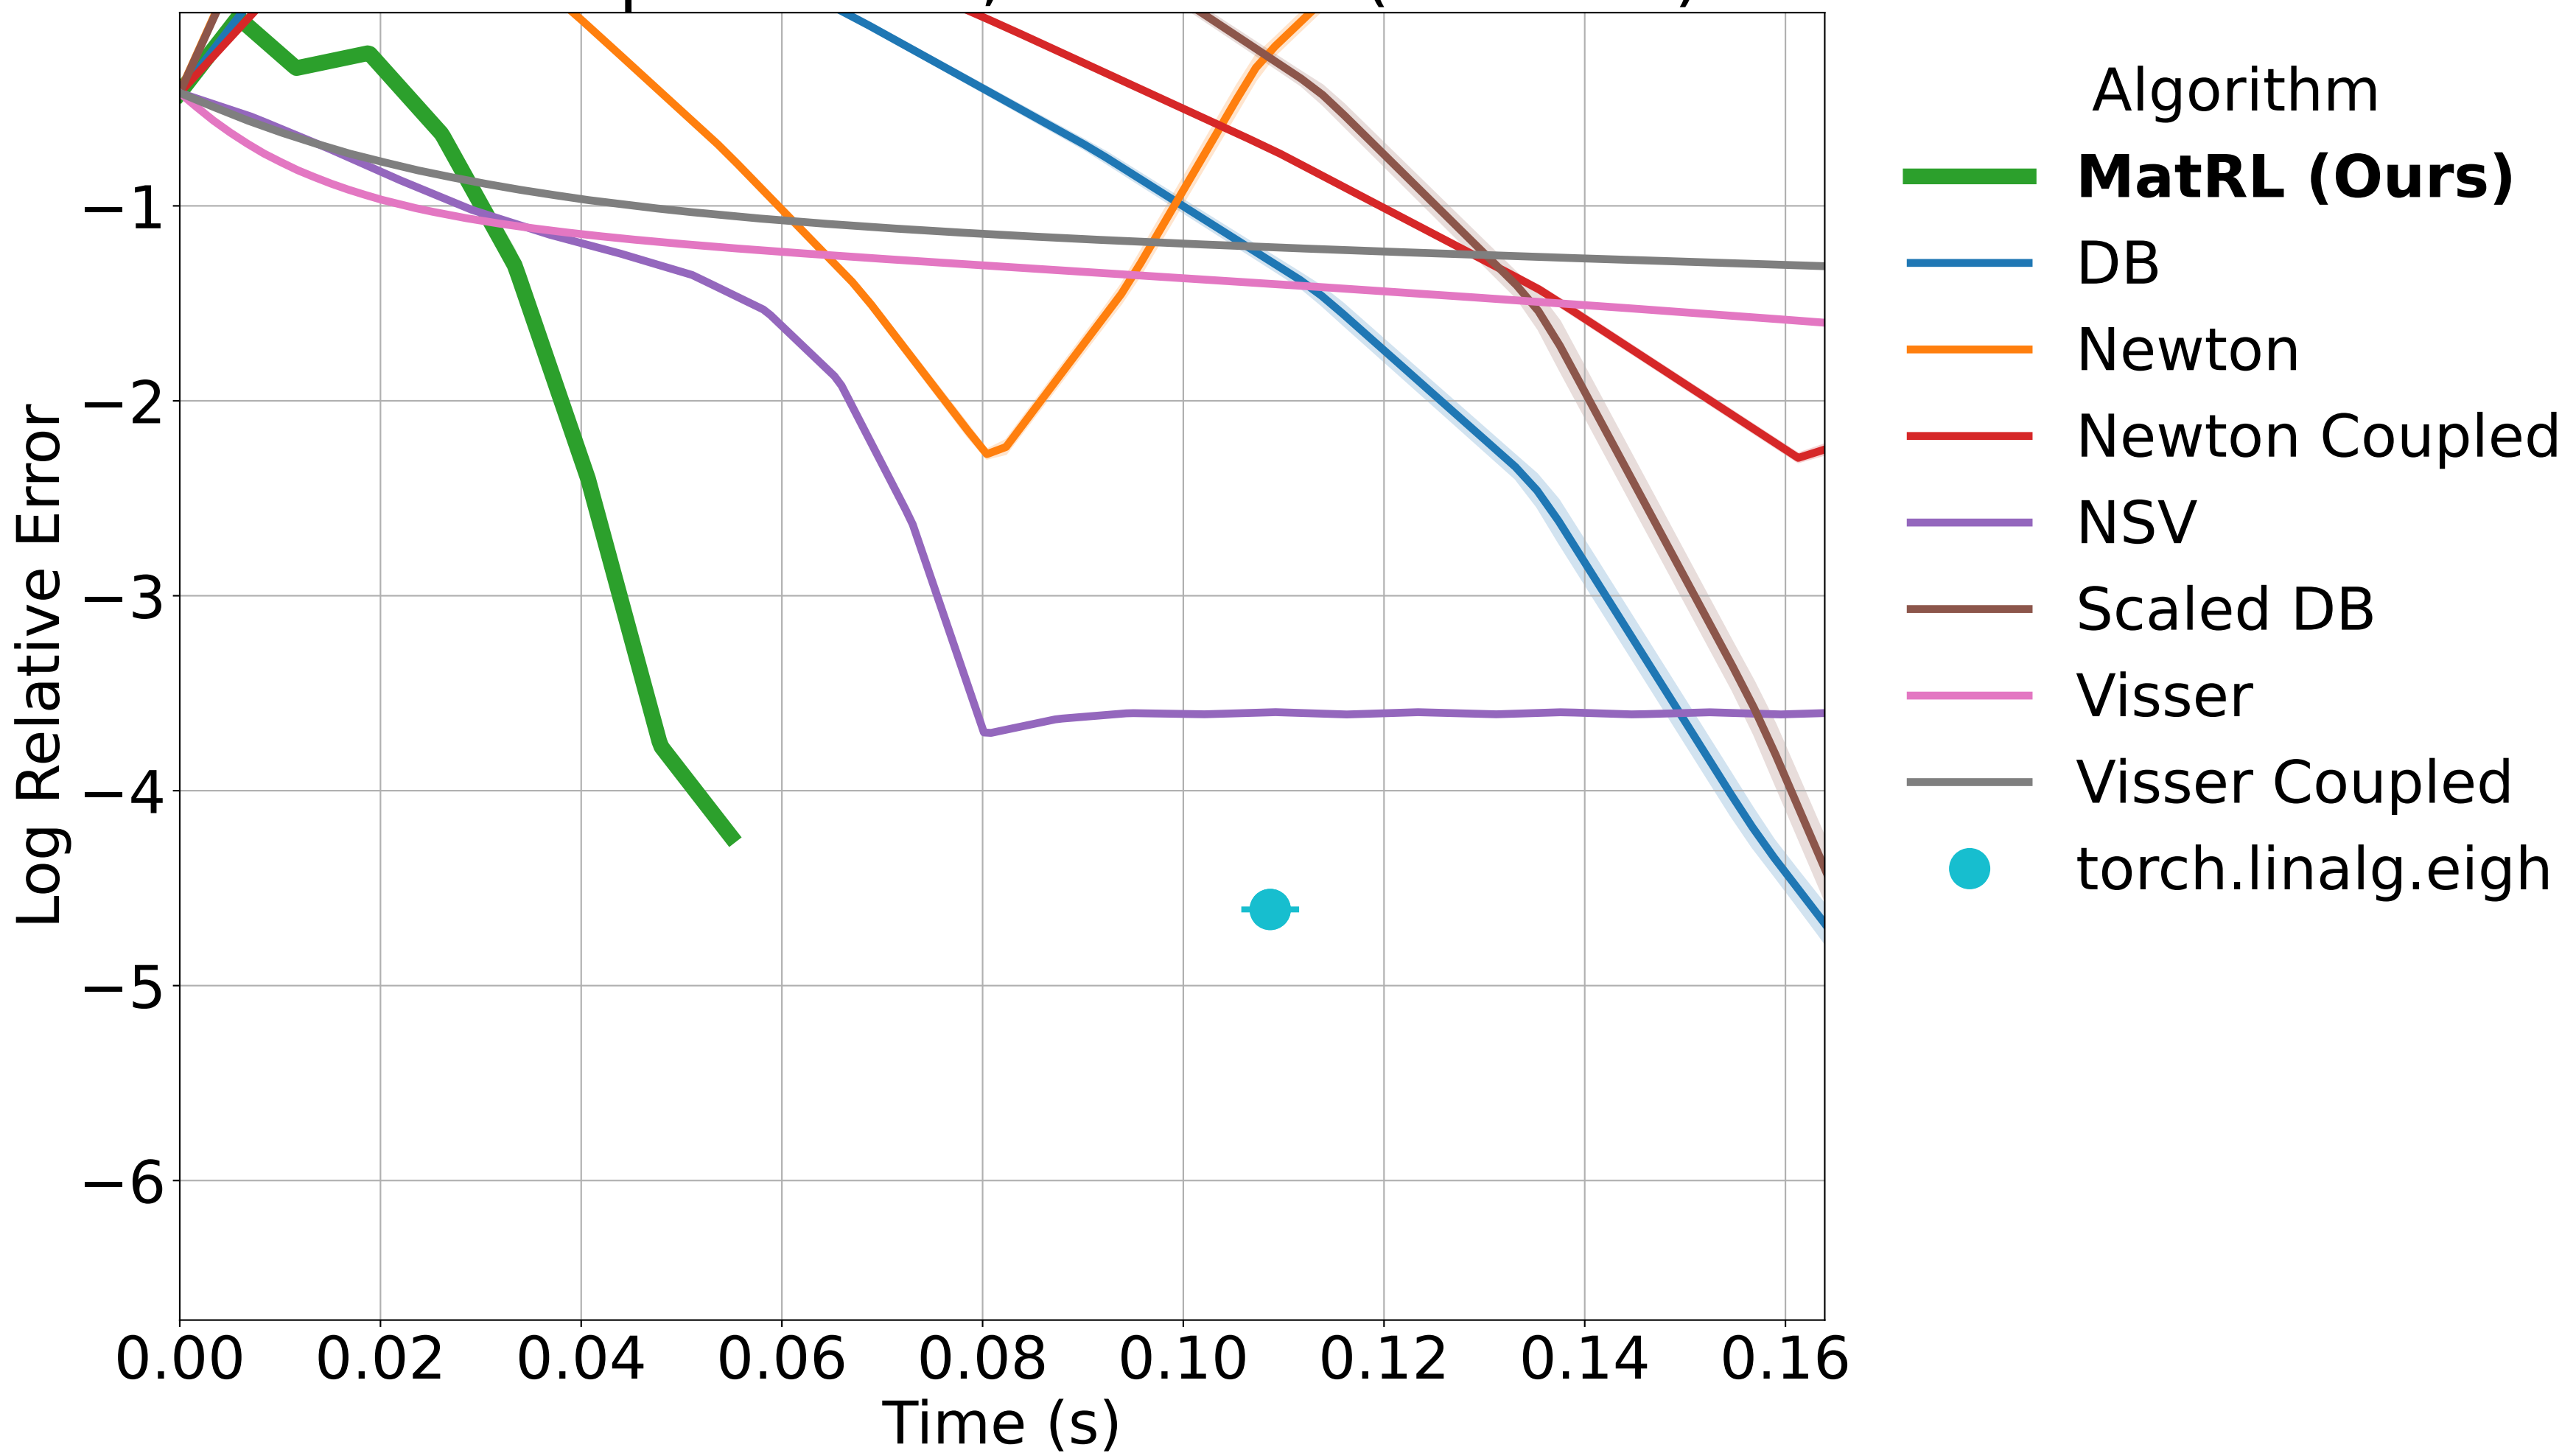

Supplement: supplementary_material [file sqrt_CIFAR_d=3072.pdf › code/results/sqrt_cifar_zca/sqrt_CIFAR_d=3072.pdf]

# Matrix Square Root, Wishart (d=5000)

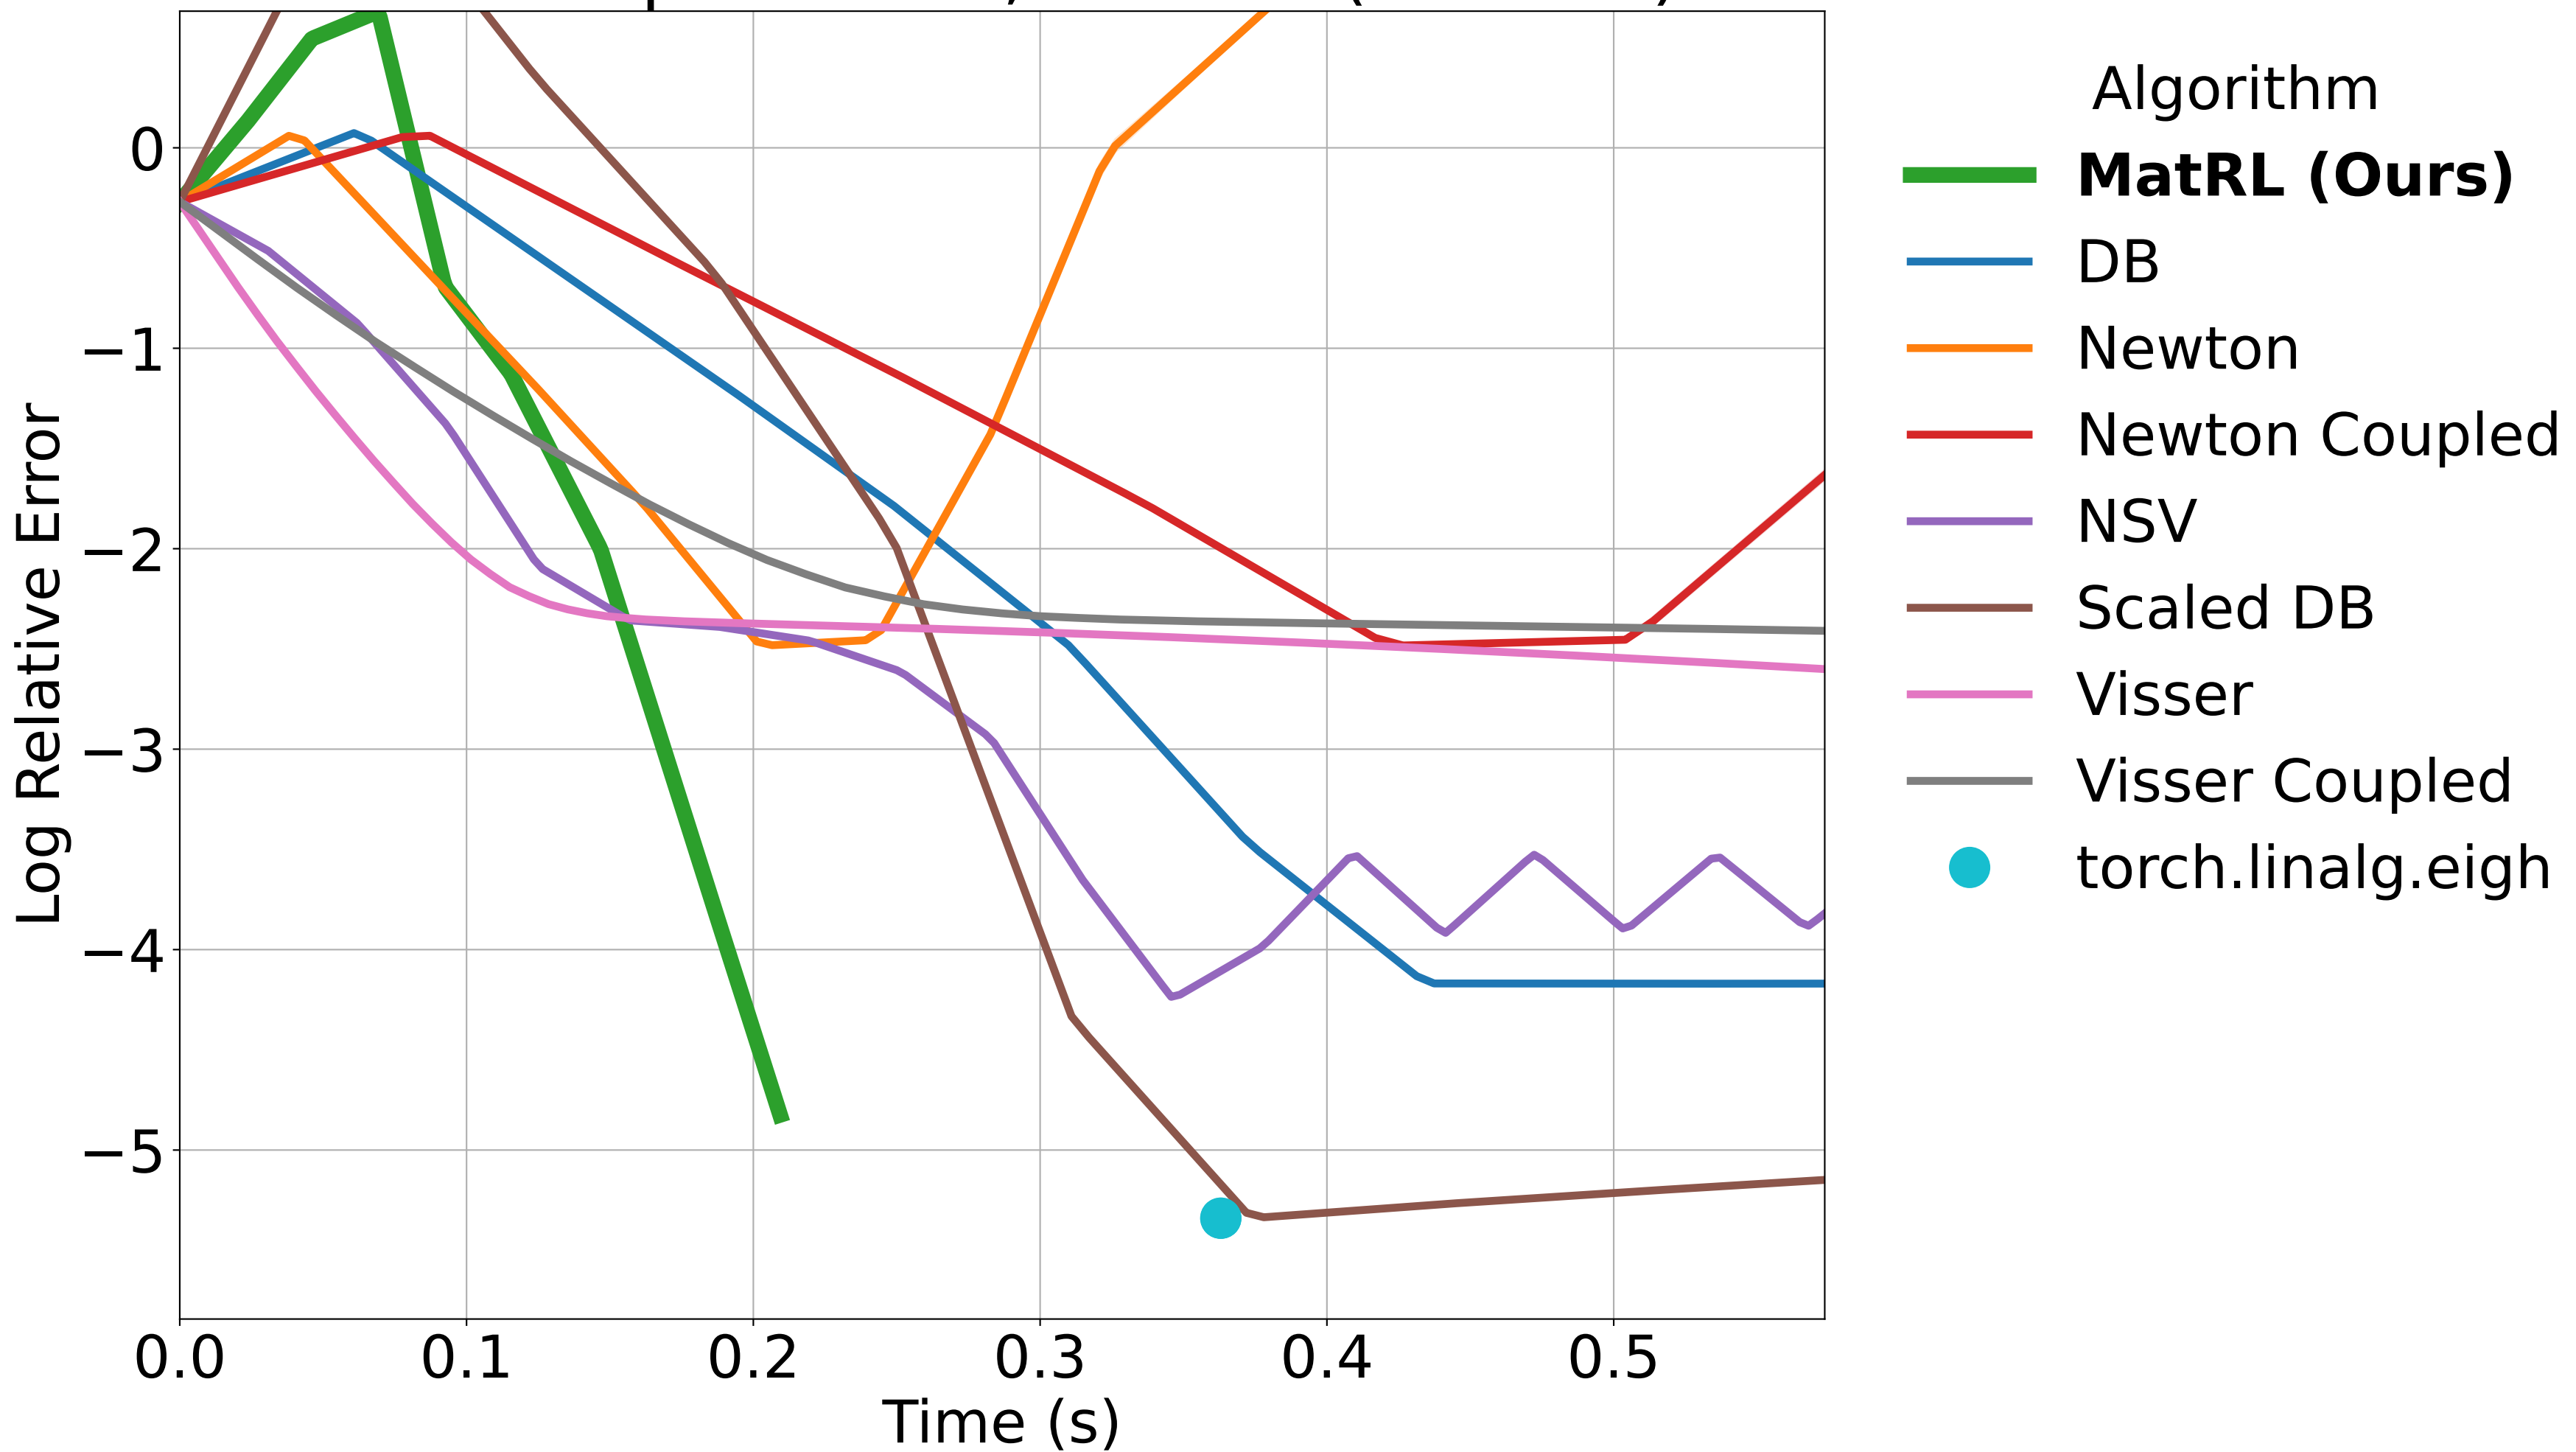

Supplement: supplementary_material [file sqrt_wishart_d=5000.pdf › code/results/sqrt_d5000/sqrt_wishart_d=5000.pdf]

# Matrix Square Root, Wishart Uniform (d=5000)

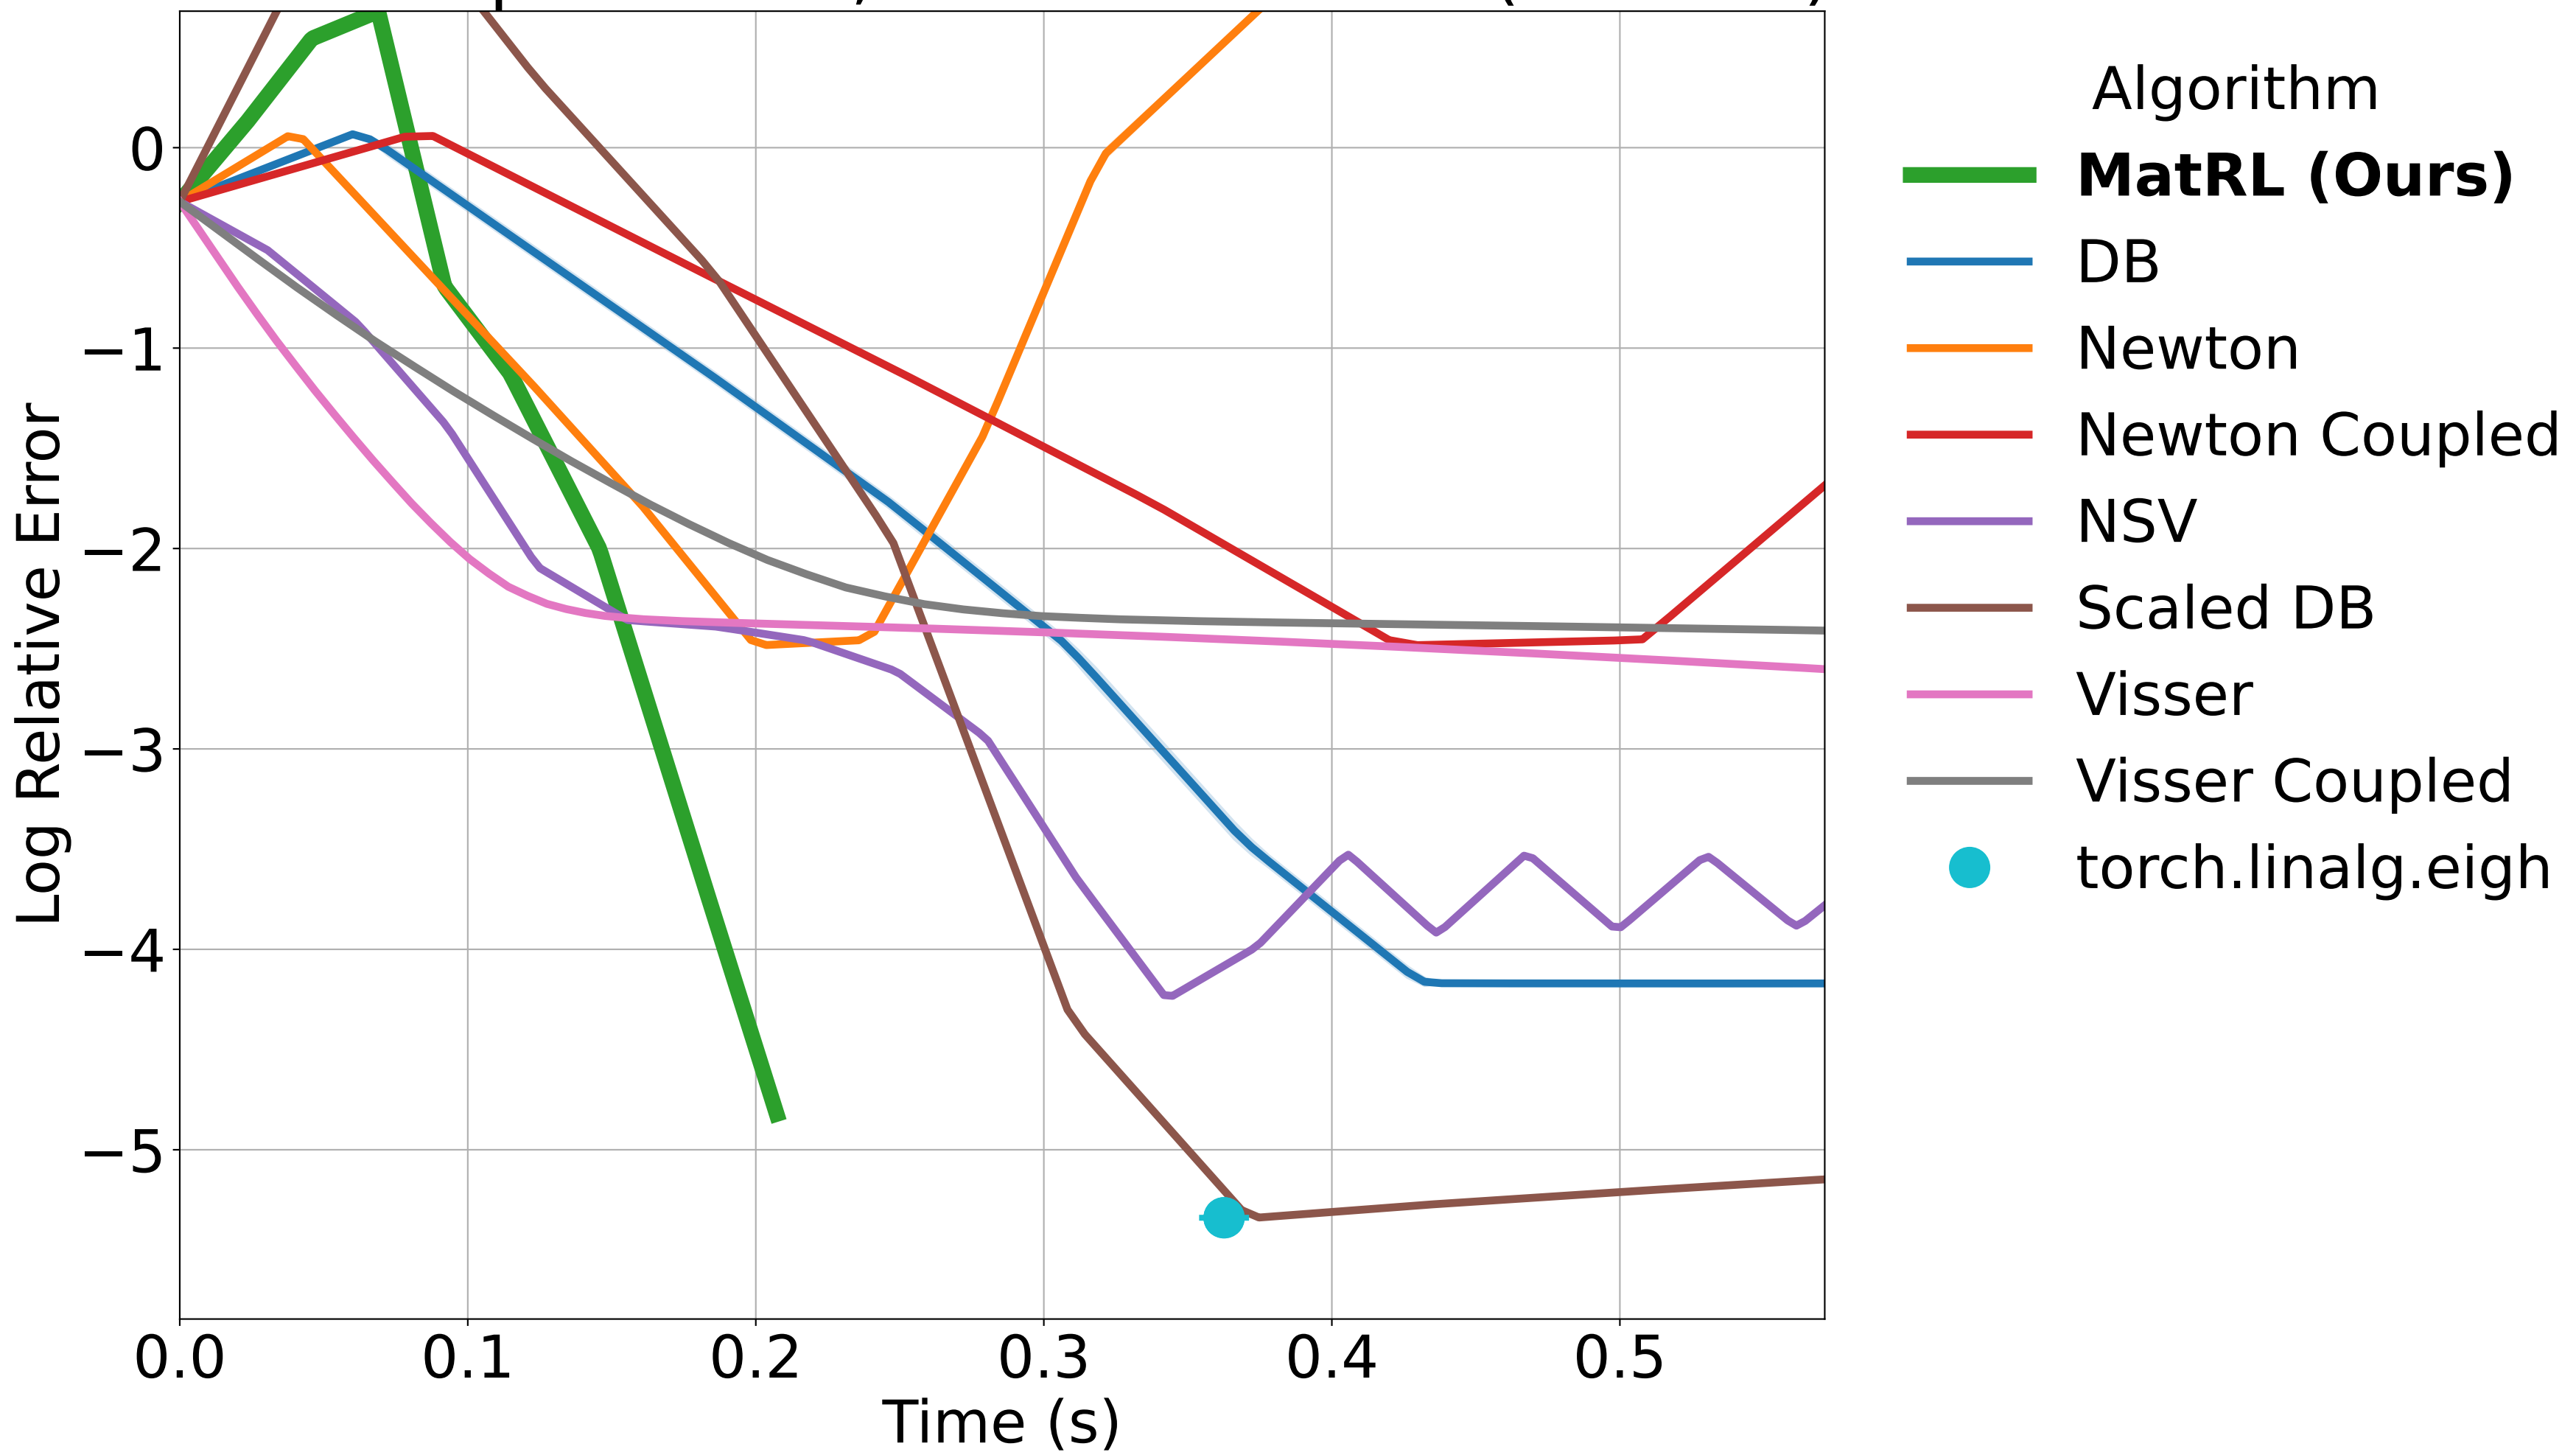

Supplement: supplementary_material [file sqrt_wishart_unif_d=5000.pdf › code/results/sqrt_wishart_unif/sqrt_wishart_unif_d=5000.pdf]
